# Supplementary material for: A phenoxo-bridged dicopper(ii) complex as a model for phosphatase activity: mechanistic insights from a combined experimental and computational study
Source: Royal Society of Chemistry journal article supplement (doi:10.1039/c6dt03514k), 2017-01-01
Supplement: c6dt03514k1.pdf [file c6dt03514k1.pdf]

Pages S1-S42

## Supporting Information

### **A phenoxo-bridged dicopper(II) complex as a model for phosphatase activity: mechanistic insights from combined experimental and computational Study†**

Suman K. Barman, Totan Mandal, Debasis Koley, Francesc Lloret and Rabindranath Mukherjee\*

---

#### **Figures and Tables**

**Fig. S1.** Perspective view of  $[\text{Cu}^{\text{II}}_2(\text{L}^1)(\mu\text{-O}_2\text{CMe})_2][\text{NO}_3] \cdot 3\text{Et}_2\text{O}$  (**1** · 3Et<sub>2</sub>O).

**Fig. S2.** UV-VIS spectrum of **1**.

**Fig. S3.** Titration-curve obtained for **1** in 33% (v/v) MeOH-H<sub>2</sub>O with 0.07 N NaOH.

**Fig. S4.** Species-distribution curves of **1** in 33% (v/v) MeOH-H<sub>2</sub>O as a function of pH.

**Fig. S5.** ESI-MS spectrum of **1** in MeOH-H<sub>2</sub>O (33%) at pH 8.50.

**Fig. S6.** Simulated (green line) and experimental mass isotopic distribution (red line) for  $[\text{Cu}^{\text{II}}_2(\text{L}^1)(\text{HCO}_2)_2]^+$ ,  $[\text{Cu}^{\text{II}}_2(\text{L}^1)(\text{HCO}_2)(\text{OH})(\text{H}_2\text{O})]^+$  and  $[\text{Cu}^{\text{II}}_2(\text{L}^1)(\text{H}_2\text{O})_4]^+$ .

**Fig. S7.** <sup>31</sup>P NMR spectra of the product of HPNP hydrolysis by **1** at different time-intervals in MeOH-H<sub>2</sub>O at 30 °C (ref. 85% H<sub>3</sub>PO<sub>4</sub> as external standard).  
[Complex] =  $4.62 \times 10^{-5}$  M; [HPNP] =  $2.30 \times 10^{-3}$  M; [buffers] =  $20 \times 10^{-3}$  M; *I* = 0.1 M (NaNO<sub>3</sub>), pH = 8.50.

**Fig. S8.** Time-course for the change in the absorbance for the hydrolysis of HPNP catalysed by **1**. Conditions: [HPNP] =  $5 \times 10^{-5}$  M; [complex] =  $30 \times 10^{-5}$  to  $75 \times 10^{-5}$  M; buffer CHES (pH 8.50), *I* = 0.1 M (NaNO<sub>3</sub>) in MeOH-H<sub>2</sub>O (33%, v/v) at 30 °C.

**Fig. S9.** Fitting of raw-data to *pseudo*-first-order mechanism for the hydrolysis of HPNP catalyzed by **1**. Conditions: [HPNP] =  $5 \times 10^{-5}$  M; [complex] =  $30 \times 10^{-5}$  to  $75 \times 10^{-5}$  M; buffer CHES (pH 8.50), *I* = 0.1 M (NaNO<sub>3</sub>) in MeOH-H<sub>2</sub>O (33%, v/v) at 30 °C.

**Fig. S10.** Dependence of the observed rate-constants on the concentration of **1** for the hydrolysis of HPNP. Conditions: [HPNP] =  $5 \times 10^{-5}$  M; [complex] =  $30 \times 10^{-5}$  to  $75 \times 10^{-5}$  M; buffer CHES (pH 8.50),  $I = 0.1$  M (NaNO<sub>3</sub>) in MeOH–H<sub>2</sub>O (33%, v/v) at 30 °C.

**Fig. S11.** ESI–MS spectrum of **1** and HPNP (1:30) at pH 8.50 in MeOH–H<sub>2</sub>O (33%, v/v).

**Fig. S12.** Simulated (green line) and experimental mass isotopic distribution (red line) for [Cu<sup>II</sup><sub>2</sub>(L<sup>1</sup>)(HCO<sub>2</sub>)(HPNP)]<sup>+</sup> and [Cu<sup>II</sup><sub>2</sub>(L<sup>1</sup>)(HCO<sub>2</sub>)(Cyp)]<sup>+</sup>.

**Fig. S13.** Dependence of the initial reaction rate ( $V_0$ ) on the HPNP concentration for the hydrolysis reaction promoted by **1**.

**Fig. S14.** Percentage-inhibition by acetate ion in hydrolysis of HPNP catalysed by **1**. Conditions: [Complex] =  $4.62 \times 10^{-5}$  M, [HPNP] =  $4.62 \times 10^{-4}$  M; buffer CHES (pH 8.50),  $I = 0.1$  M (NaNO<sub>3</sub>) in MeOH–H<sub>2</sub>O (33%, v/v) at 30 °C.

**Fig. S15.** Linearizations of the observed rate-constants for the hydrolysis of HPNP ( $5 \times 10^{-5}$  M) promoted by complex **1** ( $50 \times 10^{-5}$  M) as a function of temperature: (a) Arrhenius equation and (b) Eyring equation. Conditions: [buffer] =  $20 \times 10^{-3}$  M (CHES, pH = 8.50);  $I = 0.1$  M (NaNO<sub>3</sub>) in MeOH–H<sub>2</sub>O (33%, v/v).

**Fig. S16.** Optimized-geometries for the HPNP hydrolysis catalysed by **1**, starting from **I<sup>A</sup>**. All distances are given in Å.

**Fig. S17.** Optimized-geometries for the HPNP hydrolysis catalysed by **1**, starting from **I<sup>B</sup>**, where both the hydroxo groups are terminally coordinated. All distances are given in Å.

**Fig. S18.** The free-energy profile for the HPNP hydrolysis catalysed by **1**, starting from **I<sup>B</sup>**.

**Fig. S19.** The free-energy profile for the HPNP hydrolysis catalyzed by **1** starting from **I<sup>A</sup> aq.**

**Fig. S20.** The free-energy profile for the HPNP hydrolysis catalyzed by **4** starting from **I<sup>B</sup> aq.**

**Figure S21.** Optimized geometries for [Cu<sup>II</sup><sub>2</sub>(L<sup>1</sup>)(μ-OMe)(OMe)(HPNP)] and

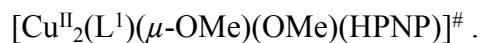

**Table S1** Mulliken spin-density population of **1** in HS and BS state

**Table S2** Optimized-coordinates for  $[\text{Cu}^{\text{II}}_2(\text{L}^1)(\mu\text{-OH})(\text{OH})]^+$  (**I<sup>A</sup>**)

**Table S3** Optimized-coordinates for  $[\text{Cu}^{\text{II}}_2(\text{L}^1)(\text{OH})_2]^+$  (**I<sup>B</sup>**)

**Table S4** Optimized-coordinates for  $[\text{Cu}^{\text{II}}_2(\text{L}^1)(\mu\text{-OH})(\text{OH})(\text{H}_2\text{O})]^+$  (**I<sup>A</sup><sub>aq</sub>**)

**Table S5** Optimized-coordinates for  $[\text{Cu}^{\text{II}}_2(\text{L}^1)(\text{OH})_2(\text{H}_2\text{O})]^+$  (**I<sup>B</sup><sub>aq</sub>**)

**Table S6** Optimized-coordinates for  $[\text{Cu}^{\text{II}}_2(\text{L}^1)(\mu\text{-OH})(\text{OH})(\text{HPNP})]$  (**II<sup>A</sup>**)

**Table S7** Optimized-coordinates for  $[\text{Cu}^{\text{II}}_2(\text{L}^1)(\text{OH})_2(\text{HPNP})]$  (**II<sup>B</sup>**)

**Table S8** Optimized-coordinates for  $[\text{Cu}^{\text{II}}_2(\text{L}^1)(\mu\text{-OH})(\text{OH})(\text{HPNP})]^\#$  (**TS<sup>A</sup>**)

**Table S9** Optimized-coordinates for  $[\text{Cu}^{\text{II}}_2(\text{L}^1)(\text{OH})_2(\text{HPNP})]^\#$  (**TS<sup>B</sup>**)

**Table S10** Optimized-coordinates for  $[\text{Cu}^{\text{II}}_2(\text{L}^1)(\mu\text{-OH})(\text{H}_2\text{O})(\text{Cyp})]$  (**III<sup>A</sup>**)

**Table S11** Optimized-coordinates for  $[\text{Cu}^{\text{II}}_2(\text{L}^1)(\text{OH})(\text{H}_2\text{O})(\text{Cyp})]$  (**III<sup>B</sup>**)

**Table S12** Optimized-coordinates for HPNP

**Table S13** Optimized-coordinates for Cyp

**Table S14** Optimized-coordinates for PnP

**Table S15** Optimized-coordinates for  $[\text{Cu}^{\text{II}}_2(\text{L}^1)(\mu\text{-OH})(\text{OH})(\text{HPNP})]$

**Table S16** Optimized-coordinates for  $[\text{Cu}^{\text{II}}_2(\text{L}^1)(\mu\text{-OH})(\text{OH})(\text{HPNP})]^\#$

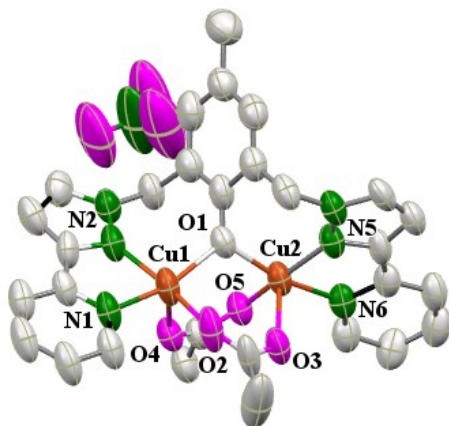

**Fig. S1.** Perspective view of  $[\text{Cu}^{\text{II}}_2(\text{L}^1)(\mu\text{-O}_2\text{CMe})_2][\text{NO}_3] \cdot 3\text{Et}_2\text{O}$  (**1** ·  $3\text{Et}_2\text{O}$ ), without solvent of crystallization. Selected bond-lengths:  $\text{Cu1-N1} = 2.057 \text{ \AA}$ ,  $\text{Cu1-N2} = 1.953 \text{ \AA}$ ,  $\text{Cu1-O1} = 1.988 \text{ \AA}$ ,  $\text{Cu1-O2} = 1.920 \text{ \AA}$ ,  $\text{Cu1-O4} = 2.193 \text{ \AA}$ ,  $\text{Cu2-N6} = 2.033 \text{ \AA}$ ,  $\text{Cu2-N5} = 1.965 \text{ \AA}$ ,  $\text{Cu2-O5} = 1.913 \text{ \AA}$ ,  $\text{Cu2-O3} = 2.176 \text{ \AA}$ . These bond-lengths are consistent with that observed for  $[\text{Cu}^{\text{II}}_2(\text{L}^1)(\mu\text{-O}_2\text{CMe})_2][\text{ClO}_4] \cdot 1.375\text{MeCN} \cdot 0.25\text{H}_2\text{O}$ .

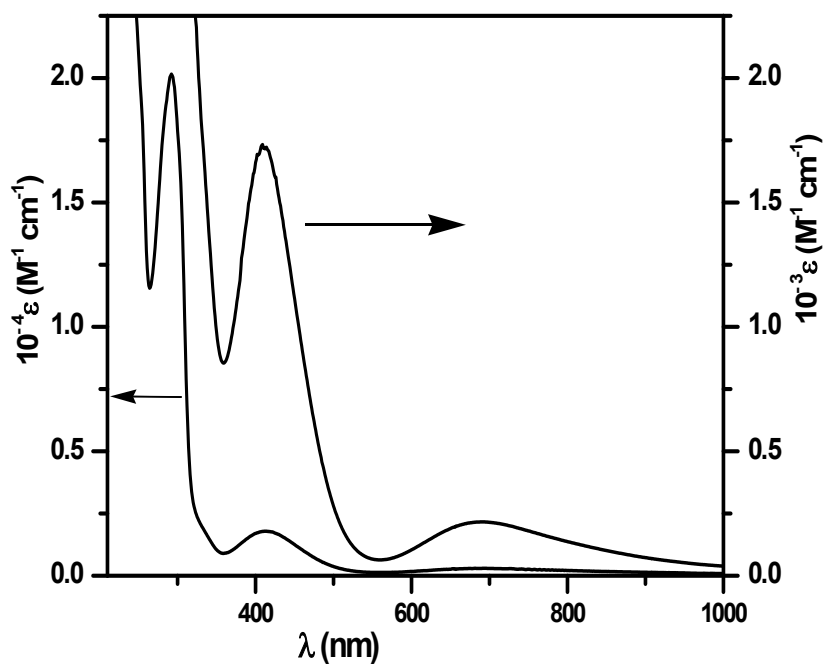

**Fig. S2.** UV-VIS spectrum of **1** in MeOH.

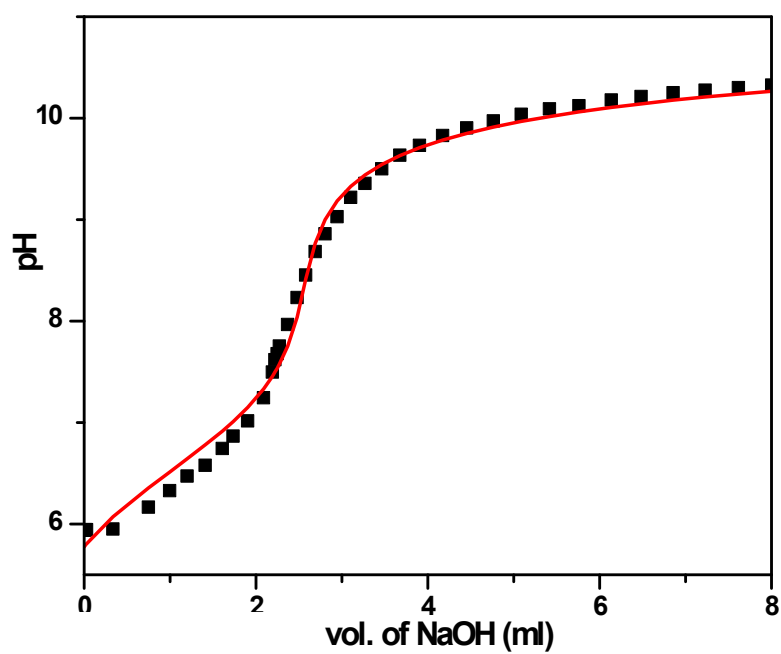

**Fig. S3.** Titration-curve obtained for **1** in 33% (v/v) MeOH-H<sub>2</sub>O with 0.07 N NaOH.

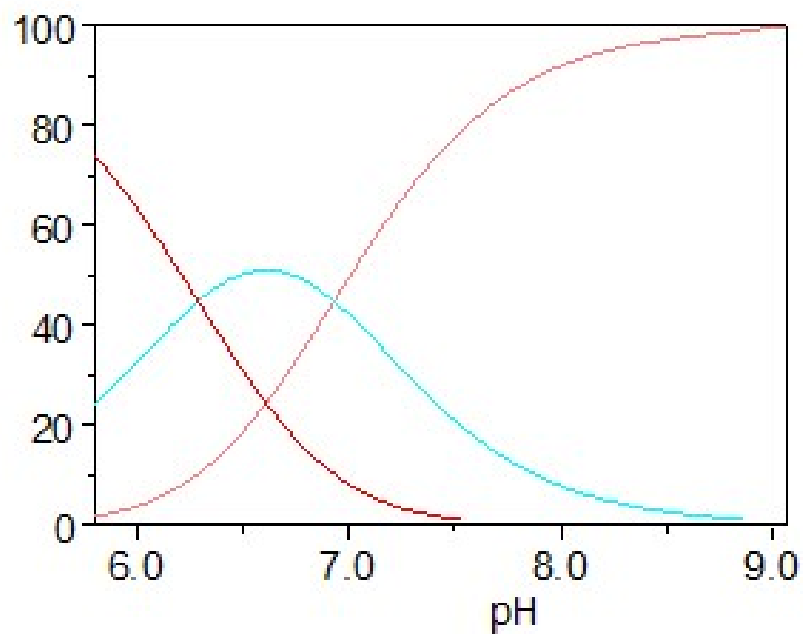

**Fig. S4.** Species-distribution curves of **1** in 33% (v/v) MeOH-H<sub>2</sub>O as a function of pH.

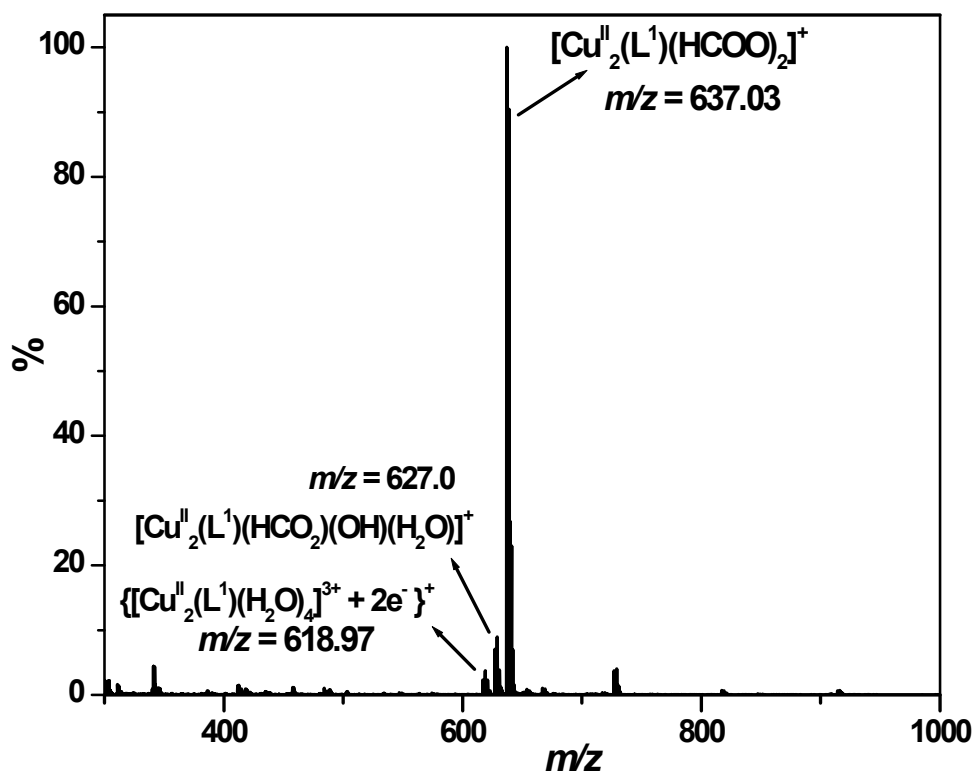

Figure S5. ESI-MS spectrum of **1** in MeOH-H<sub>2</sub>O (33%) at pH 8.50.

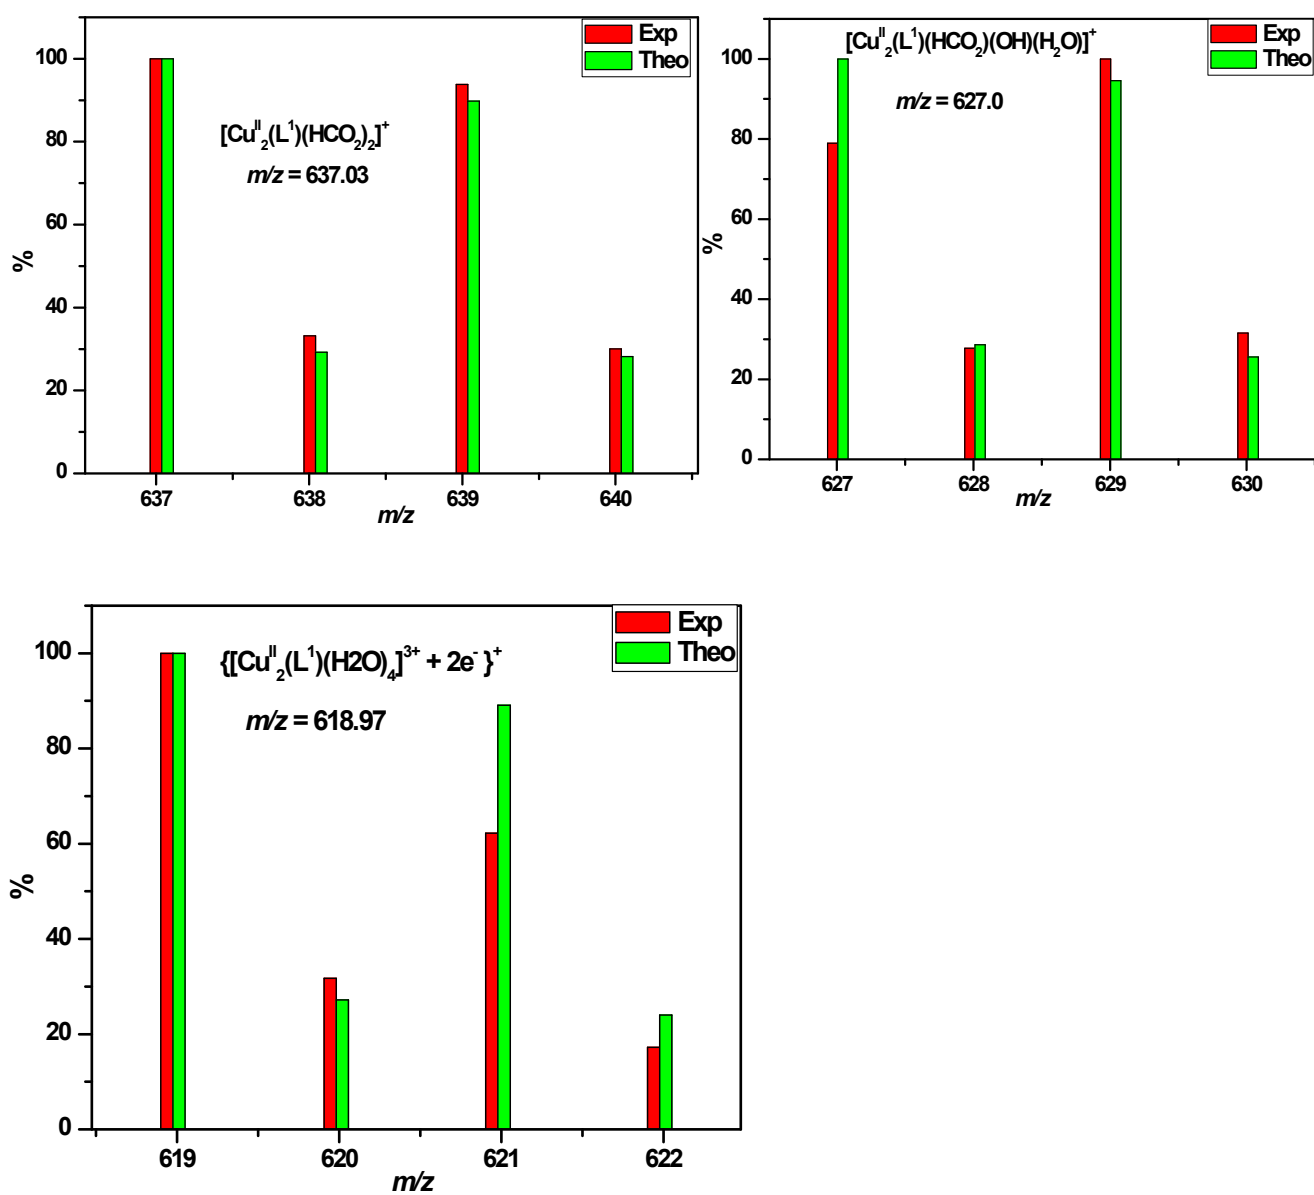

**Fig. S6.** Simulated (green line) and experimental mass isotopic distribution (red line) for  $[\text{Cu}^{\text{II}}_2(\text{L}^1)(\text{HCO}_2)_2]^+$ ,  $[\text{Cu}^{\text{II}}_2(\text{L}^1)(\text{HCO}_2)(\text{OH})(\text{H}_2\text{O})]^+$  and  $[\text{Cu}^{\text{II}}_2(\text{L}^1)(\text{H}_2\text{O})_4]^+$ .

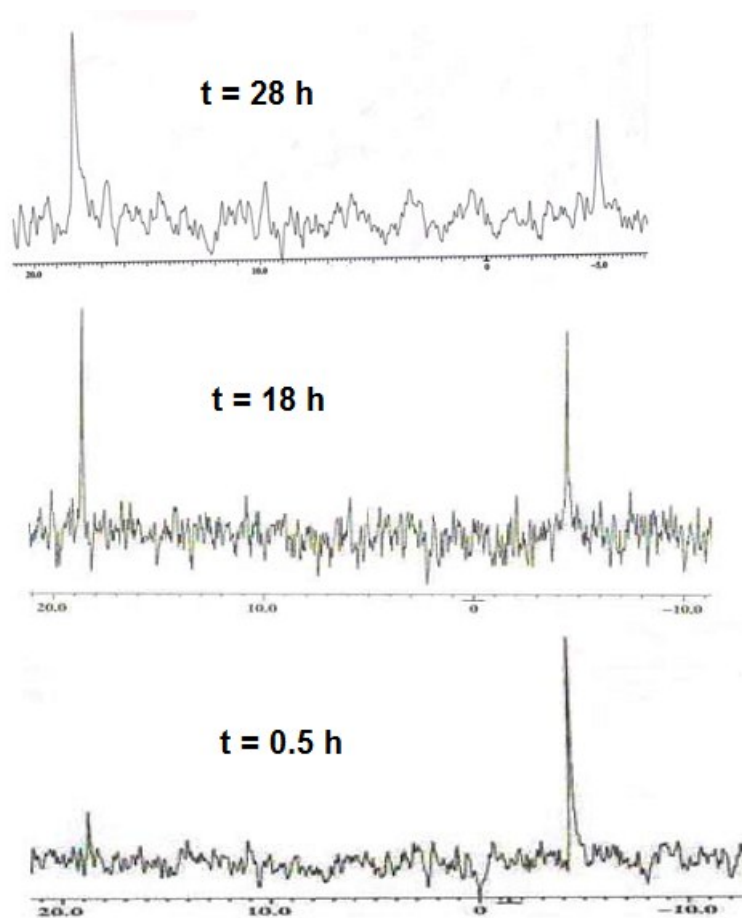

**Fig. S7.**  $^{31}\text{P}$  NMR spectra of the product of HPNP hydrolysis by **1** at different time-intervals in MeOH–H<sub>2</sub>O at 30°C (ref. 85% H<sub>3</sub>PO<sub>4</sub> as external standard). [Complex] =  $4.62 \times 10^{-5}$  M; [HPNP] =  $2.30 \times 10^{-3}$  M; [buffers] =  $20 \times 10^{-3}$  M;  $I = 0.1$  M (NaNO<sub>3</sub>), pH = 8.50.



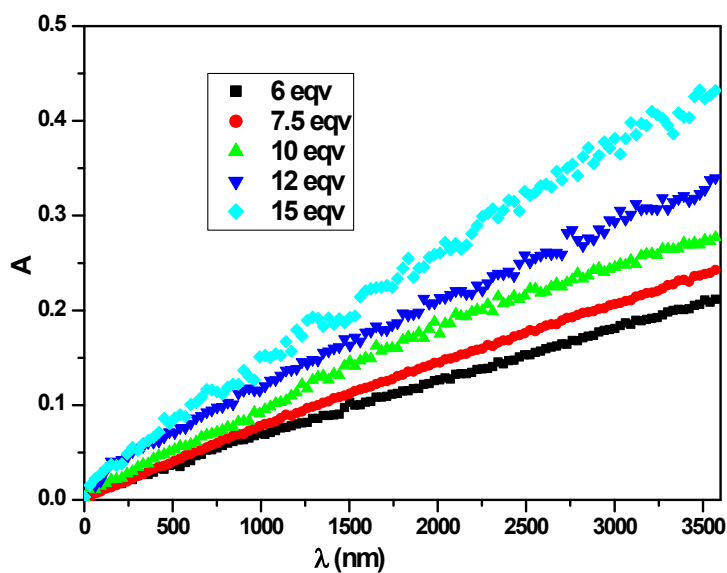

**Fig. S8.** Time-course for the change in the absorbance for the hydrolysis of HPNP catalysed by **1**. Conditions: [HPNP] =  $5 \times 10^{-5}$  M; [complex] =  $30 \times 10^{-5}$  to  $75 \times 10^{-5}$  M; buffer CHES (pH 8.50),  $I = 0.1$  M (NaNO<sub>3</sub>) in MeOH–H<sub>2</sub>O (33%, v/v) at 30 °C.

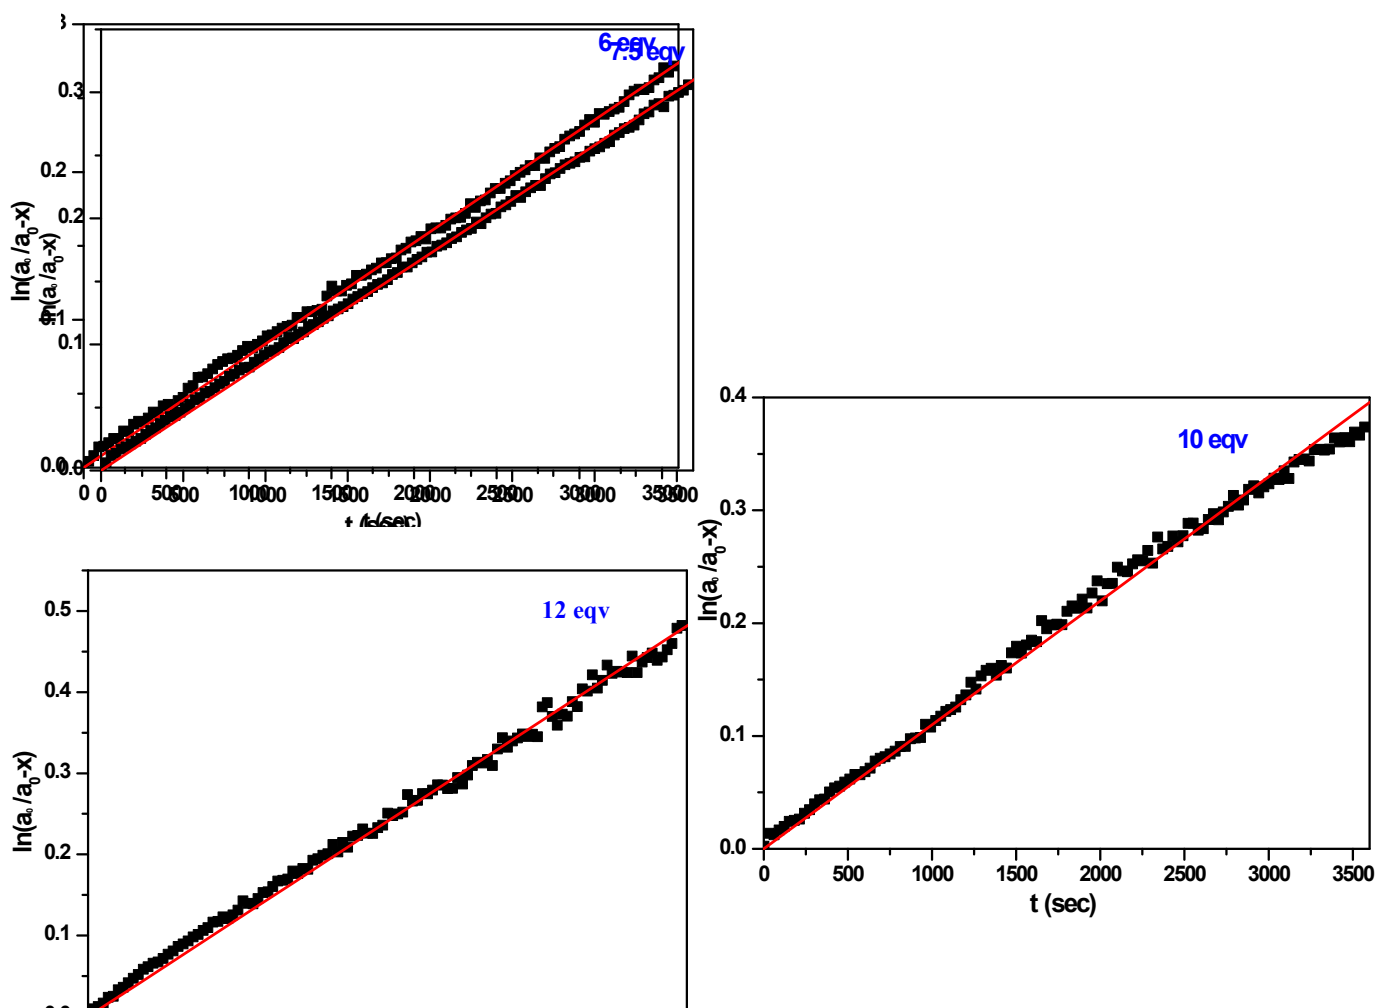

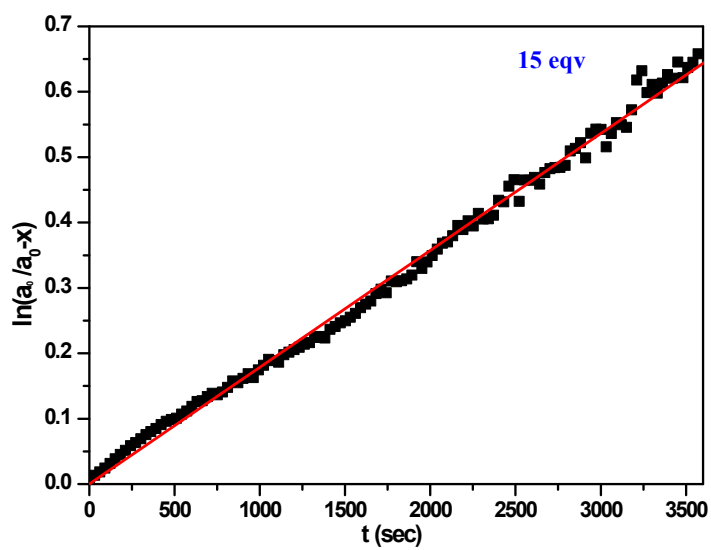

**Fig. S9.** Fitting of raw-data to *pseudo*-first-order mechanism for the hydrolysis of HPNP catalysed by **1**. Conditions:  $[\text{HPNP}] = 5 \times 10^{-5} \text{ M}$ ;  $[\text{complex}] = 30 \times 10^{-5} \text{ to } 75 \times 10^{-5} \text{ M}$ ; buffer CHES (pH 8.50),  $I = 0.1 \text{ M}$  ( $\text{NaNO}_3$ ) in MeOH–H<sub>2</sub>O (33%, v/v) at 30 °C.

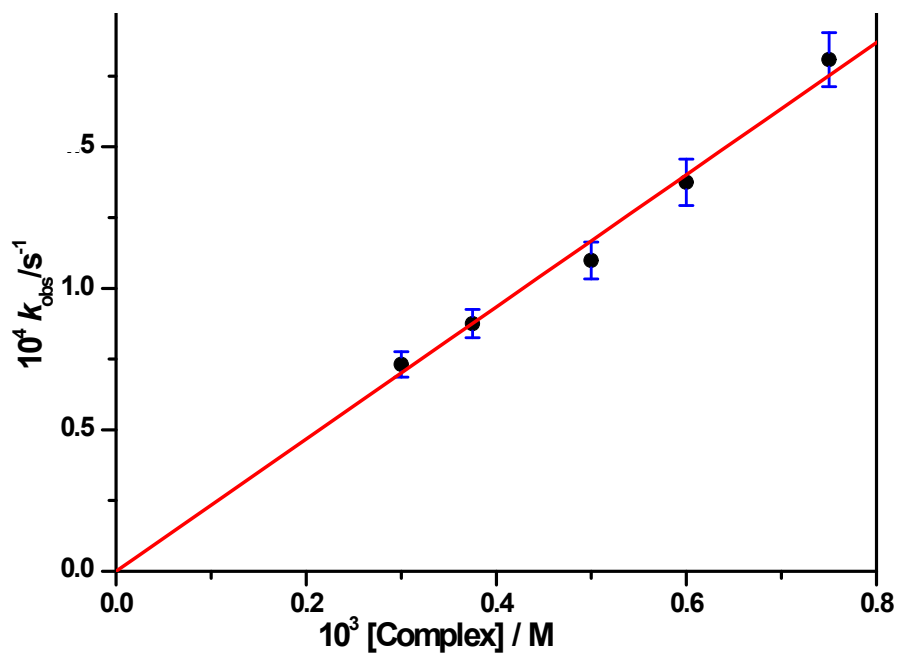

**Fig. S10.** Dependence of the observed rate-constants on the concentration of **1** for the hydrolysis of HPNP. Conditions: [HPNP] =  $5 \times 10^{-5}$  M; [complex] =  $30 \times 10^{-5}$  to  $75 \times 10^{-5}$  M; buffer CHES (pH 8.50),  $I = 0.1$  M (NaNO<sub>3</sub>) in MeOH–H<sub>2</sub>O (33%, v/v) at 30 °C.

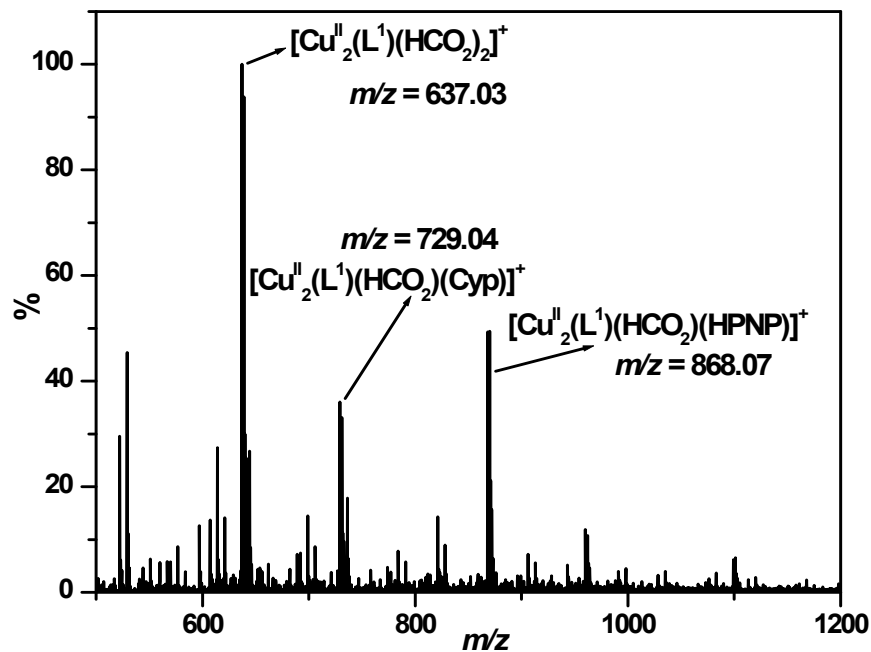

**Fig. S11.** ESI-MS spectrum of **1** and HPNP (1:30) at pH 8.50 in MeOH–H<sub>2</sub>O (33%, v/v).

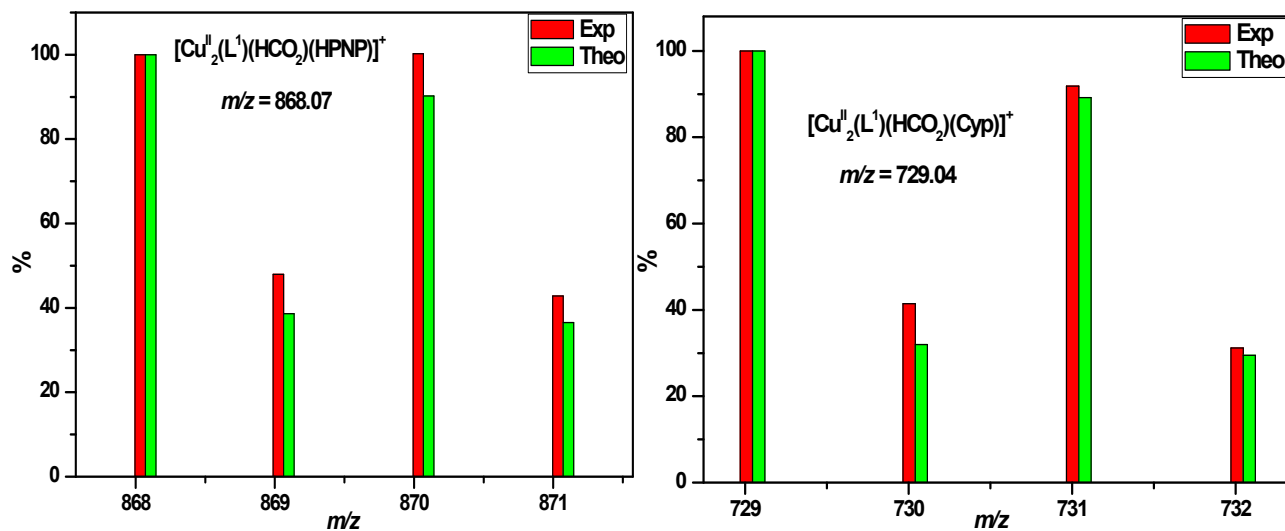

**Fig. S12.** Simulated (green line) and experimental mass isotopic distribution (red line) for  $[\text{Cu}^{\text{II}}_2(\text{L}^1)(\text{HCO}_2)(\text{HPNP})]^+$  and  $[\text{Cu}^{\text{II}}_2(\text{L}^1)(\text{HCO}_2)(\text{Cyp})]^+$ .

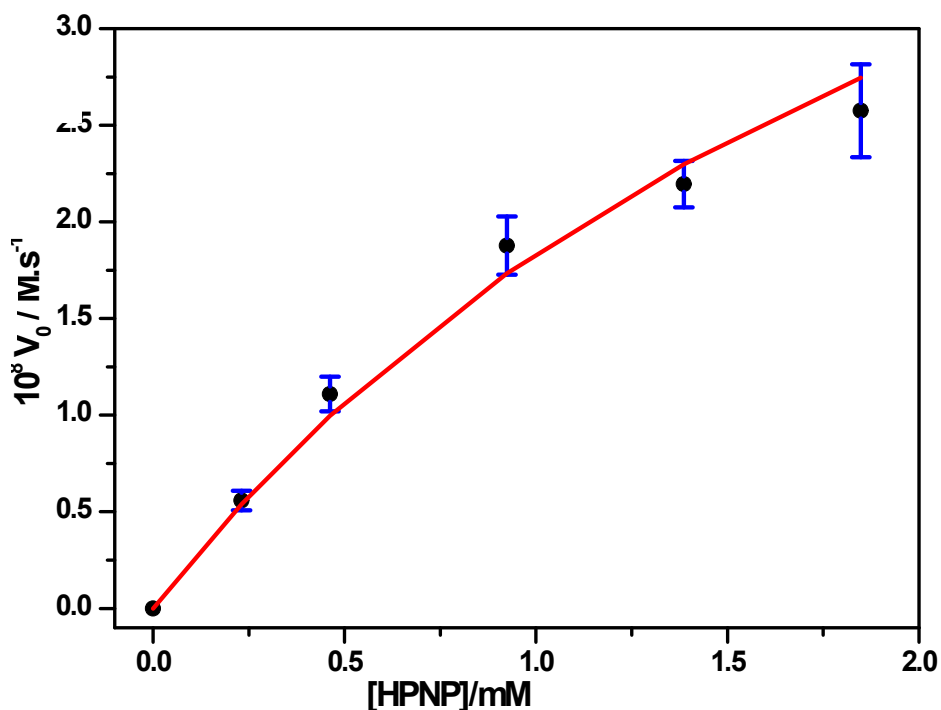

**Fig. S13.** Dependence of the initial reaction rate ( $V_0$ ) on the HPNP concentration for the hydrolysis reaction promoted by **1**. Conditions:  $[\text{complex}] = 4.62 \times 10^{-5} \text{ M}$ ;  $[\text{buffer}] = 20 \times 10^{-3} \text{ M}$  (CHES, pH = 8.50);  $I = 0.1 \text{ M}$  ( $\text{NaNO}_3$ ) in MeOH– $\text{H}_2\text{O}$  (33%, v/v) at 30 °C.  $V_{\text{max}} = 66.1 \times 10^{-9} \text{ M}\cdot\text{s}^{-1}$ ,  $K_M = 2.60 \text{ mM}$ .

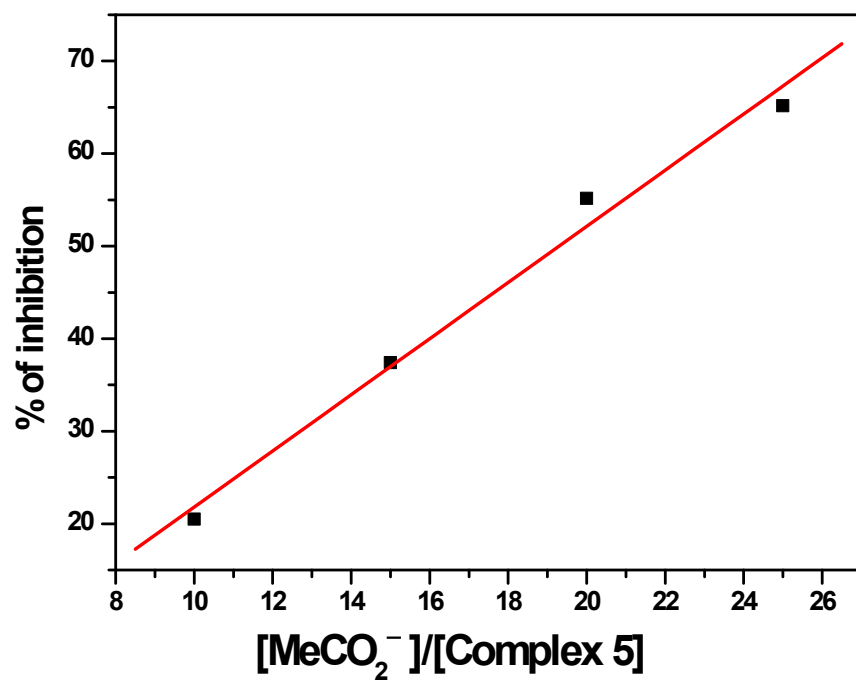

**Fig. S14.** Percentage inhibitions by acetate ion in hydrolysis of HPNP catalysed by **1**. Conditions:  $[\text{Complex}] = 4.62 \times 10^{-5} \text{ M}$ ,  $[\text{HPNP}] = 4.62 \times 10^{-4} \text{ M}$ ; buffer CHES (pH 8.50),  $I = 0.1 \text{ M}$  ( $\text{NaNO}_3$ ) in MeOH–H<sub>2</sub>O (33%, v/v) at 30 °C.

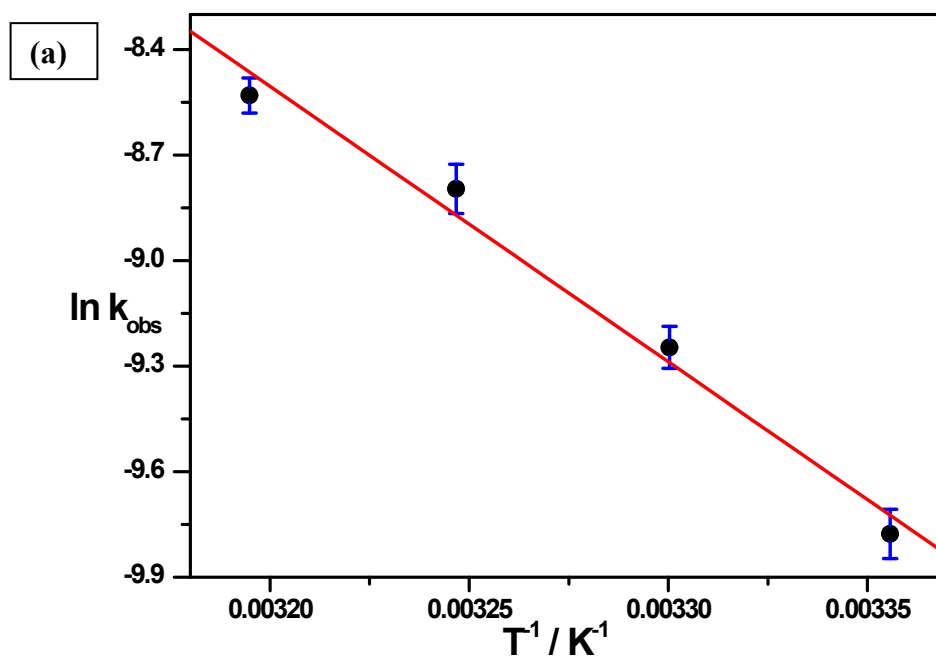

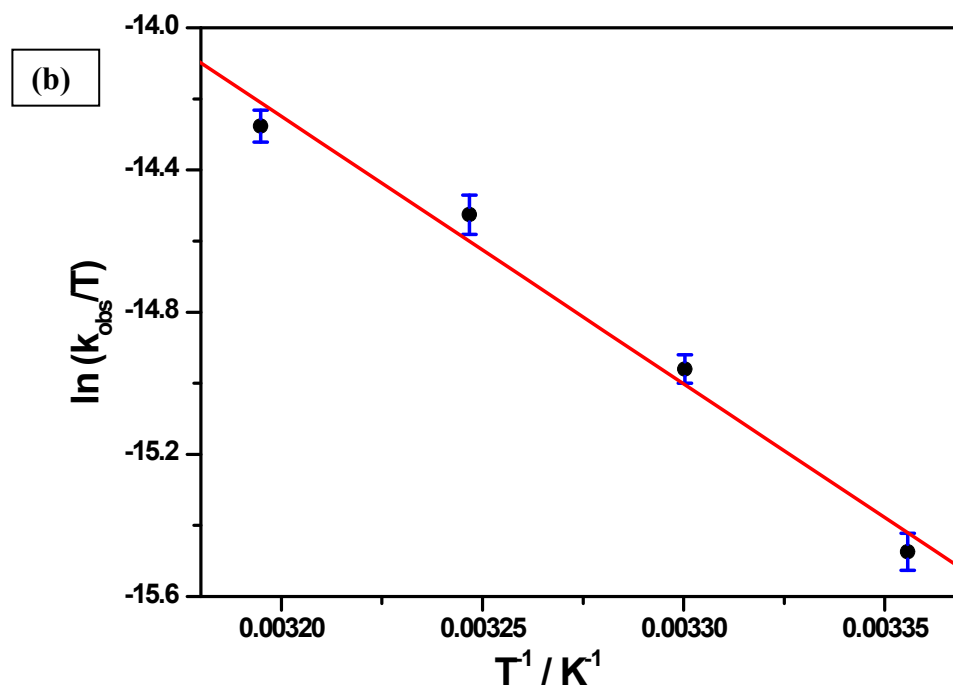

**Fig. S15.** Linearizations of the observed rate constants for the hydrolysis of HPNP ( $5 \times 10^{-5}$  M) promoted by complex **1** ( $50 \times 10^{-5}$  M) as a function of temperature: (a) Arrhenius equation and (b) Eyring equation. Conditions: [buffer] =  $20 \times 10^{-3}$  M (CHES, pH = 8.50);  $I = 0.1$  M ( $\text{NaNO}_3$ ) in MeOH–H<sub>2</sub>O (33%, v/v).

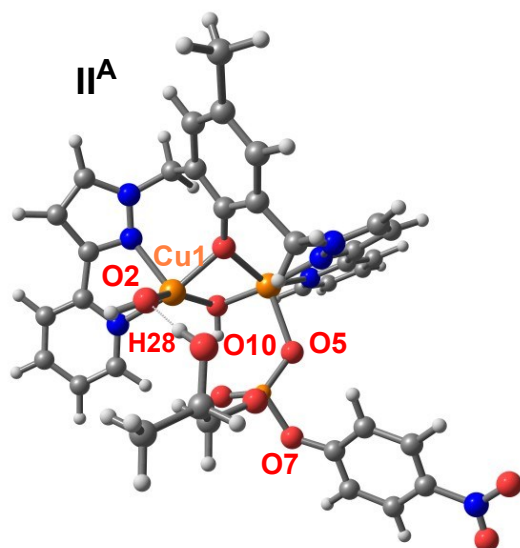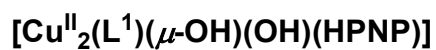

Cu1-O2 = 1.946, Cu2-O5 = 2.204  
 O2-H28 = 1.654, O10-H28 = 1.002  
 O10-P1 = 4.207, P1-O7 = 1.677

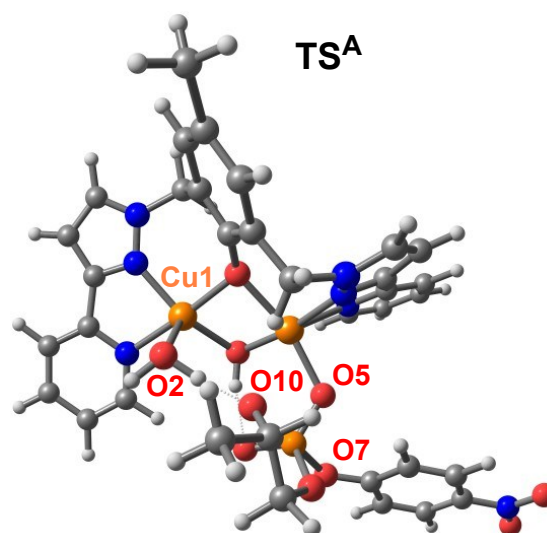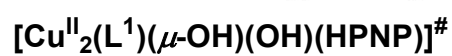

Cu1-O2 = 2.244, Cu2-O5 = 2.025  
 O2-H28 = 1.033, O10-H28 = 1.506  
 O10-P1 = 2.281, P1-O7 = 1.768

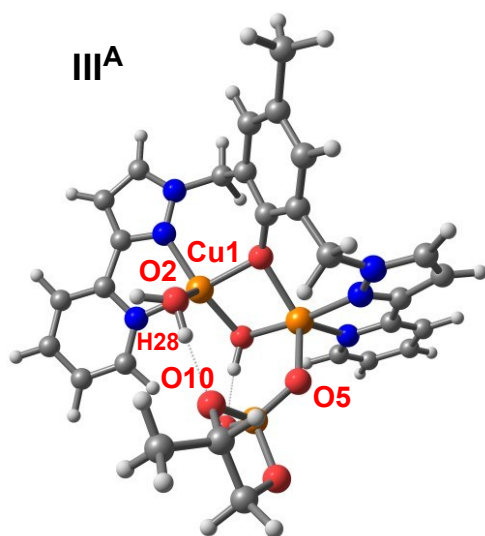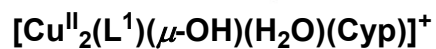

Cu1-O2 = 2.360, Cu2-O5 = 2.165  
 O2-H28 = 0.977, O10-H28 = 1.826, O10-P1 = 1.663

**Fig. S16.** Optimized-geometries for the HPNP hydrolysis catalysed by **1**. All distances are given in Å.

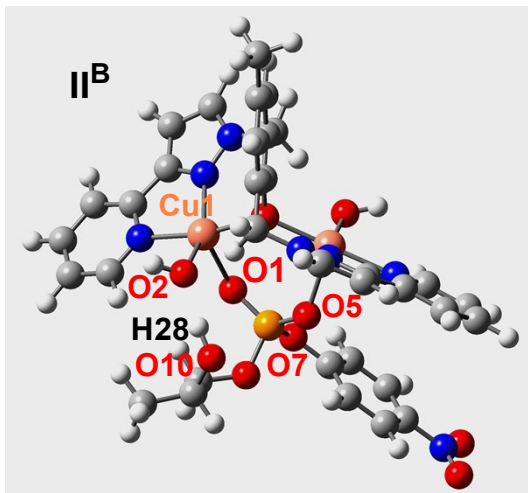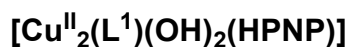

$\text{Cu1-O2} = 1.948$ ,  $\text{Cu2-O5} = 2.254$   
 $\text{O2-H28} = 1.649$ ,  $\text{O10-H28} = 0.999$   
 $\text{O10-P1} = 3.579$ ,  $\text{P1-O7} = 1.681$

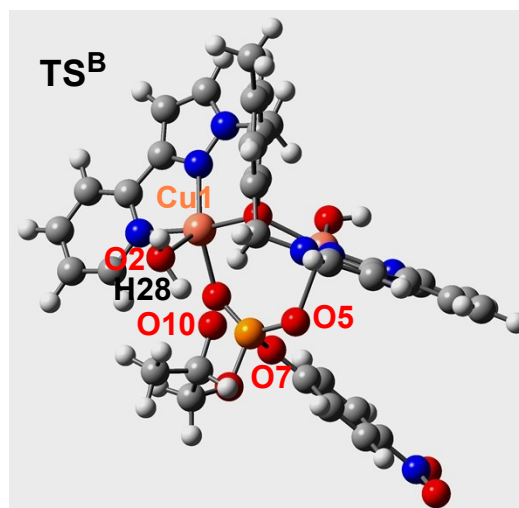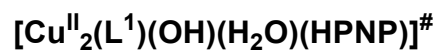

$\text{Cu1-O2} = 2.145$ ,  $\text{Cu2-O5} = 2.240$   
 $\text{O2-H28} = 1.080$ ,  $\text{O10-H28} = 1.380$   
 $\text{O10-P1} = 2.286$ ,  $\text{P1-O7} = 1.783$

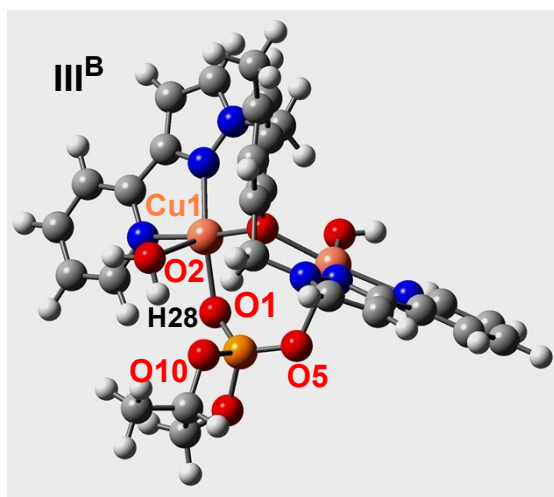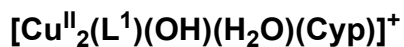

$\text{Cu1-O1} = 2.010$ ,  $\text{Cu1-O2} = 2.360$ ,  $\text{Cu2-O5} = 2.326$   
 $\text{O2-H28} = 0.973$ ,  $\text{O10-H28} = 1.983$ ,  $\text{O10-P1} = 1.660$

**Fig. S17.** Optimized-geometries for the HPNP hydrolysis catalyzed by **4** starting from **I<sup>B</sup>**, where both the hydroxo groups are terminally coordinated. All distances are given in Å.



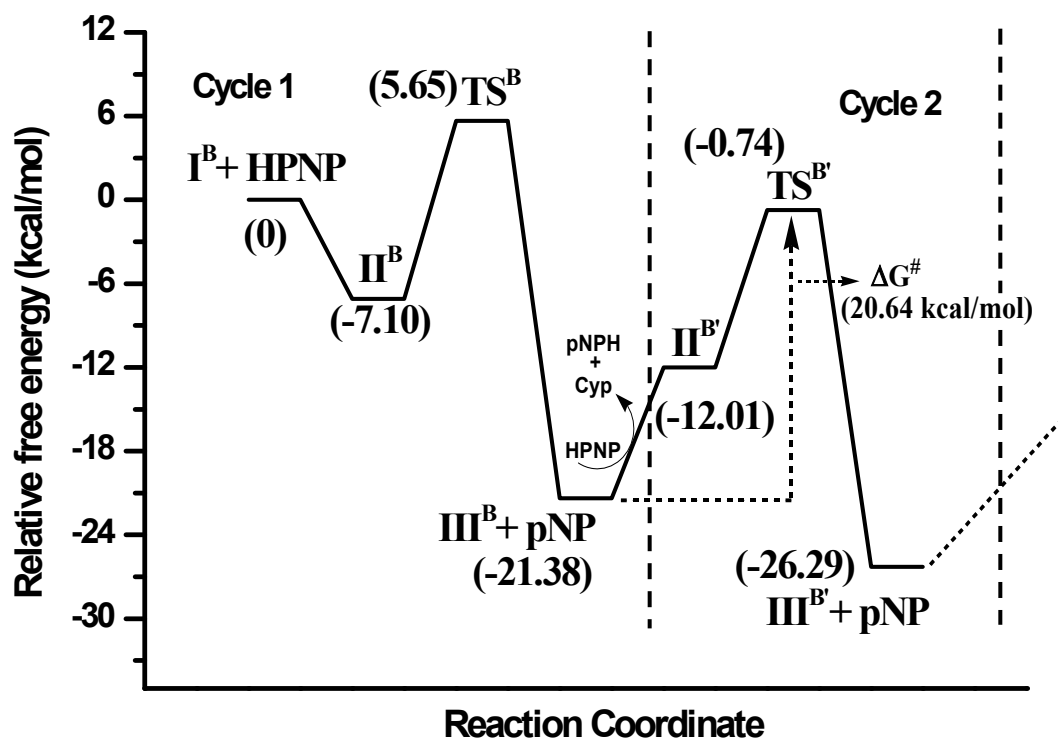

**Fig. S18.** The free-energy profile for the HPNP hydrolysis catalyzed by **1**, starting from  $I^B$  in presence of excess HPNP.

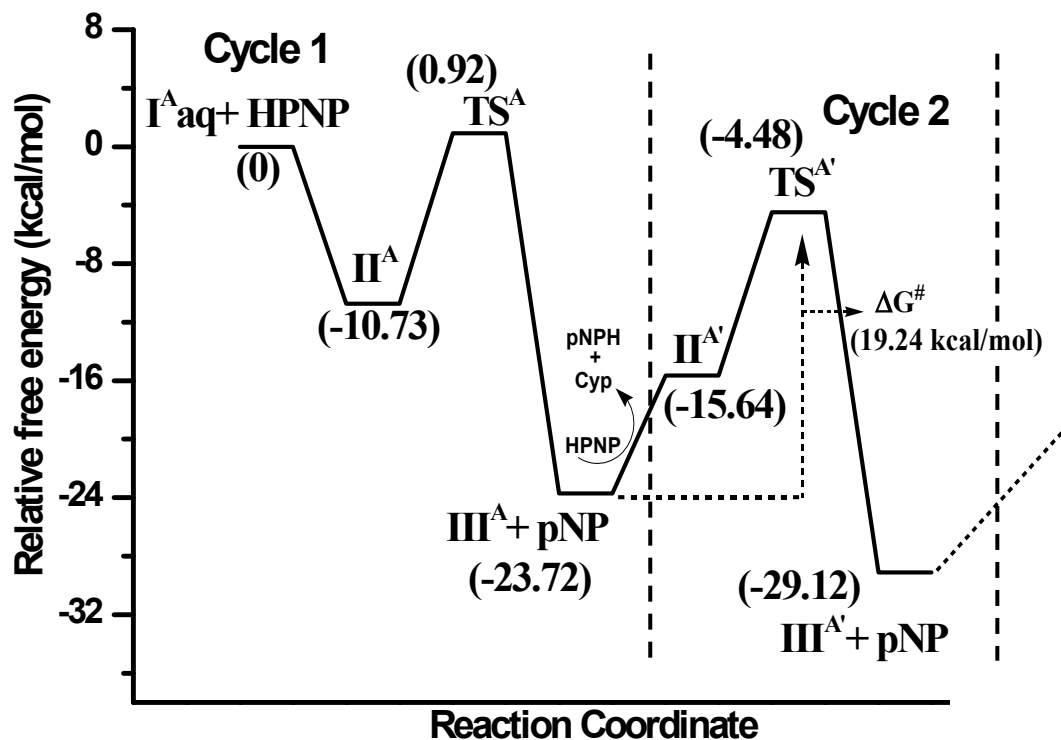

Fig. S19. The free-energy profile for the HPNP hydrolysis catalyzed by **1**, starting from  $I^A \text{ aq}$  in presence of excess HPNP.

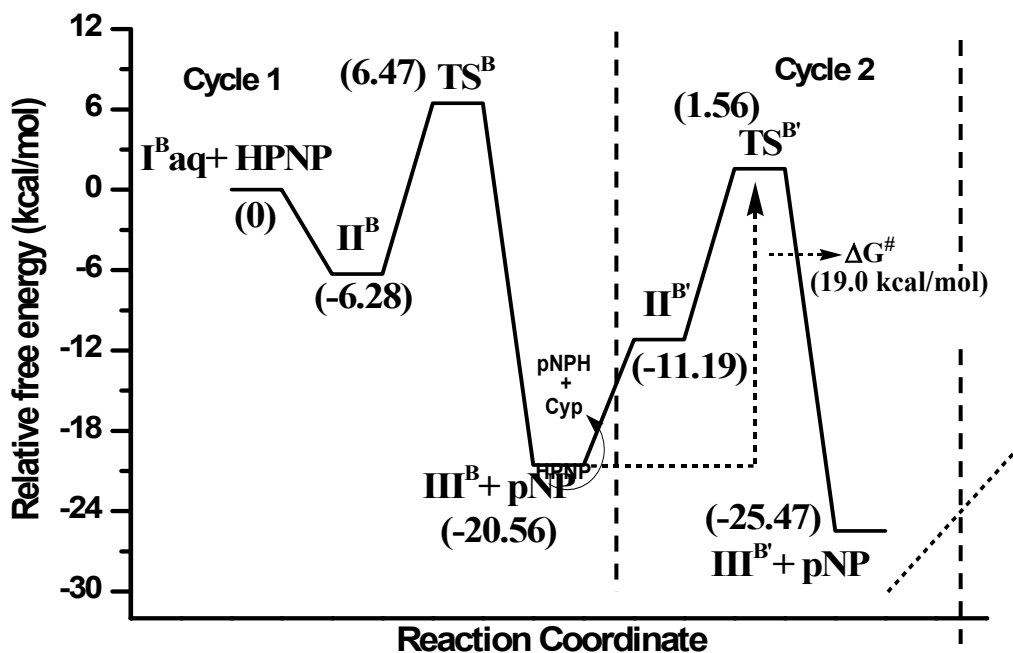

Fig. S20. The free-energy profile for the HPNP hydrolysis catalyzed by **1**, starting from  $I^B \text{ aq}$  in presence of excess HPNP.

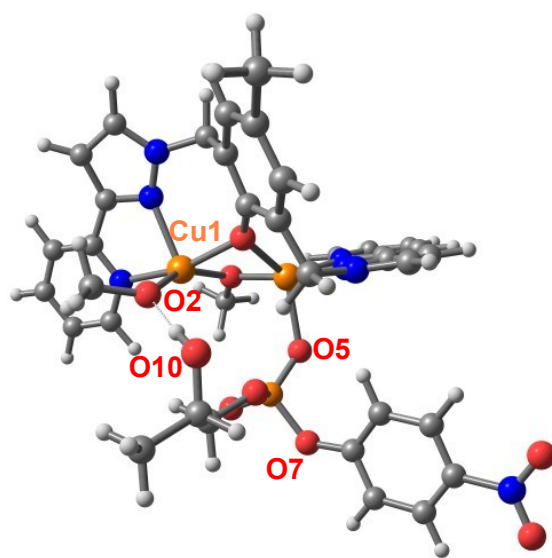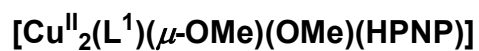

Cu1-O2 = 1.938, Cu2-O5 = 2.160  
 O2-H28 = 1.653, O10-H28 = 0.998  
 O10-P1 = 4.391, P1-O7 = 1.686

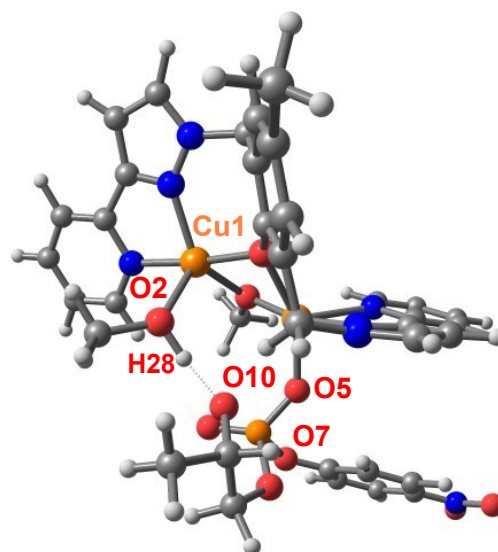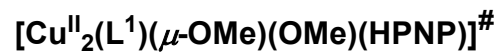

Cu1-O2 = 2.175, Cu2-O5 = 2.009  
 O2-H28 = 1.034, O10-H28 = 1.499  
 O10-P1 = 2.281, P1-O7 = 1.798

**Fig. S21.** Optimized-geometries for [Cu<sup>II</sup><sub>2</sub>(L<sup>1</sup>)( $\mu$ -OMe)(OMe)(HPNP)] (left) and [Cu<sup>II</sup><sub>2</sub>(L<sup>1</sup>)( $\mu$ -OMe)(OMe)(HPNP)]<sup>#</sup> (right).

**Table S1** Mulliken spin-density population of **1** in HS and BS state

| Atom | HS state | BS state |
|------|----------|----------|
| Cu1  | 0.620    | 0.613    |
| Cu2  | 0.622    | -0.614   |
| O1   | 0.126    | 0.002    |
| C25  | -0.003   | -0.002   |
| C27  | -0.003   | 0.002    |
| O2   | 0.116    | 0.114    |
| O3   | 0.000    | 0.001    |
| O4   | 0.001    | 0.002    |
| O5   | 0.117    | -0.115   |

**Table S2** Optimized-coordinates for  $[\text{Cu}^{\text{II}}_2(\text{L}^1)(\mu\text{-OH})(\text{OH})]^+$  (**I<sup>A</sup>**)

|    |              |              |              |
|----|--------------|--------------|--------------|
| Cu | 0.204966000  | -0.069304000 | -0.162752000 |
| N  | 0.026950000  | -0.013764000 | 1.919207000  |
| N  | 2.099876000  | -0.076737000 | 0.356892000  |
| C  | 2.383838000  | -0.058131000 | 1.667584000  |
| Cu | -1.559616000 | -0.208019000 | -2.634344000 |
| C  | 1.348759000  | -1.539687000 | -2.525248000 |
| C  | 1.222327000  | -0.054368000 | 2.562219000  |
| C  | -1.106401000 | 0.001777000  | 2.630190000  |
| N  | 3.251369000  | -0.014870000 | -0.313100000 |
| C  | 3.777052000  | 0.000686000  | 1.841333000  |
| O  | -1.487971000 | 0.539869000  | -0.825058000 |
| N  | -1.314136000 | -1.061964000 | -4.414790000 |
| N  | -1.673614000 | 1.597014000  | -4.534916000 |
| C  | -1.489012000 | -0.513811000 | -5.623165000 |
| C  | -1.801985000 | 0.922520000  | -5.696797000 |
| C  | 0.969289000  | -2.761454000 | -3.148325000 |
| C  | 2.738262000  | -1.277017000 | -2.392017000 |
| C  | 1.299083000  | -0.078230000 | 3.953524000  |
| N  | -0.990300000 | -2.349720000 | -4.592518000 |
| C  | -1.940623000 | 2.905577000  | -4.528449000 |
| C  | -1.276800000 | -1.497856000 | -6.613124000 |
| C  | -2.194929000 | 1.544047000  | -6.886541000 |
| C  | 1.949270000  | -3.663361000 | -3.574280000 |
| C  | -0.477923000 | -3.104451000 | -3.435667000 |
| C  | 3.682821000  | -2.209114000 | -2.830258000 |
| C  | 3.230996000  | 0.016302000  | -1.787537000 |
| C  | -0.946639000 | -2.648575000 | -5.913476000 |

|   |              |              |              |
|---|--------------|--------------|--------------|
| C | -2.336875000 | 3.610595000  | -5.667636000 |
| H | -1.830707000 | 3.412134000  | -3.572814000 |
| H | -1.339539000 | -1.389778000 | -7.684733000 |
| H | -2.293715000 | 0.969618000  | -7.800966000 |
| C | -2.463913000 | 2.911760000  | -6.867488000 |
| H | 1.627121000  | -4.589389000 | -4.045689000 |
| C | 3.317755000  | -3.423123000 | -3.417723000 |
| H | -0.581804000 | -4.163454000 | -3.674064000 |
| H | -1.139219000 | -2.880935000 | -2.594566000 |
| H | -0.680414000 | -3.638267000 | -6.253672000 |
| H | -2.537912000 | 4.674467000  | -5.608652000 |
| H | -2.771461000 | 3.420888000  | -7.775221000 |
| C | 4.351097000  | -4.433474000 | -3.853231000 |
| H | 4.008165000  | -5.007049000 | -4.719248000 |
| H | 4.565814000  | -5.151421000 | -3.051889000 |
| H | 5.295375000  | -3.948286000 | -4.116453000 |
| H | 2.264715000  | -0.111876000 | 4.444434000  |
| H | -2.032331000 | 0.033484000  | 2.067301000  |
| C | -1.107349000 | -0.019695000 | 4.023681000  |
| H | -2.047266000 | -0.004273000 | 4.562298000  |
| H | 4.738053000  | -1.970211000 | -2.717089000 |
| C | 4.292201000  | 0.027719000  | 0.549793000  |
| H | 5.309370000  | 0.082646000  | 0.192020000  |
| H | 4.338809000  | 0.032502000  | 2.761600000  |
| C | 0.115773000  | -0.059909000 | 4.691467000  |
| H | 0.151261000  | -0.077431000 | 5.775548000  |
| H | 4.255471000  | 0.221172000  | -2.098550000 |
| H | 2.602494000  | 0.861442000  | -2.078952000 |
| H | -2.325735000 | 0.386214000  | -0.376828000 |
| O | -3.480841000 | -0.390473000 | -2.496104000 |
| H | -3.836254000 | -0.649597000 | -3.353926000 |
| O | 0.437177000  | -0.649468000 | -2.082504000 |

**Table S3** Optimized-coordinates for  $[\text{Cu}^{\text{II}}_2(\text{L}^1)(\text{OH})_2]^+$  (**1B**)

|    |              |              |              |
|----|--------------|--------------|--------------|
| Cu | 0.136640000  | 0.296065000  | 0.059492000  |
| O  | 0.155779000  | 0.376811000  | 1.954070000  |
| O  | 2.138984000  | 0.190908000  | 0.025936000  |
| N  | -1.931061000 | 0.222190000  | -0.260128000 |
| N  | 0.052958000  | 0.464828000  | -1.962261000 |
| C  | -1.180407000 | 0.586718000  | -2.481386000 |
| Cu | 3.241047000  | -1.385563000 | 0.592691000  |
| C  | 2.805484000  | 1.274589000  | -0.425060000 |
| O  | 2.673690000  | -2.347153000 | -0.939177000 |
| C  | -2.297999000 | 0.431271000  | -1.547882000 |
| C  | -2.872077000 | 0.016327000  | 0.669194000  |
| N  | 0.920873000  | 0.617980000  | -2.971602000 |
| C  | -1.099015000 | 0.822723000  | -3.863995000 |
| N  | 4.085366000  | -0.318890000 | 2.100088000  |
| N  | 4.363781000  | -2.872506000 | 1.549089000  |

|   |              |              |              |
|---|--------------|--------------|--------------|
| C | 4.994479000  | -0.980417000 | 2.835760000  |
| C | 5.145538000  | -2.409591000 | 2.554861000  |
| C | 3.359412000  | 2.195611000  | 0.488309000  |
| C | 2.947809000  | 1.494328000  | -1.811190000 |
| C | -3.640492000 | 0.461444000  | -1.926590000 |
| N | 4.089095000  | 0.953132000  | 2.522179000  |
| C | 4.388498000  | -4.175052000 | 1.241360000  |
| C | 5.596240000  | -0.106530000 | 3.756618000  |
| C | 5.996830000  | -3.256654000 | 3.265140000  |
| C | 4.042822000  | 3.314442000  | 0.006290000  |
| C | 3.156081000  | 1.954571000  | 1.965525000  |
| C | 3.636464000  | 2.623738000  | -2.259625000 |
| C | 2.376730000  | 0.472351000  | -2.765734000 |
| C | 4.987191000  | 1.117933000  | 3.520584000  |
| C | 5.207604000  | -5.081774000 | 1.909770000  |
| H | 3.727741000  | -4.495895000 | 0.443877000  |
| H | 6.359077000  | -0.320766000 | 4.488550000  |
| H | 6.614613000  | -2.861619000 | 4.063024000  |
| C | 6.028843000  | -4.609766000 | 2.933490000  |
| H | 4.456597000  | 4.026276000  | 0.717253000  |
| C | 4.196840000  | 3.549525000  | -1.367508000 |
| H | 3.329404000  | 2.866729000  | 2.537517000  |
| H | 2.141143000  | 1.586905000  | 2.153528000  |
| H | 5.122743000  | 2.080559000  | 3.990434000  |
| H | 5.195607000  | -6.128175000 | 1.629034000  |
| H | 6.682796000  | -5.287006000 | 3.472601000  |
| C | 4.964986000  | 4.748289000  | -1.871475000 |
| H | 6.024868000  | 4.505728000  | -2.018372000 |
| H | 4.917243000  | 5.579207000  | -1.161857000 |
| H | 4.575900000  | 5.096309000  | -2.832738000 |
| H | -3.909338000 | 0.632260000  | -2.962357000 |
| H | -2.520550000 | -0.169470000 | 1.677879000  |
| C | -4.231405000 | 0.026552000  | 0.365663000  |
| H | -4.960637000 | -0.145475000 | 1.148309000  |
| H | 3.746629000  | 2.783740000  | -3.330077000 |
| C | 0.262402000  | 0.834280000  | -4.133532000 |
| H | 0.802396000  | 0.972534000  | -5.058295000 |
| H | -1.901261000 | 0.964968000  | -4.570982000 |
| C | -4.617993000 | 0.260088000  | -0.953908000 |
| H | -5.668091000 | 0.278739000  | -1.225834000 |
| H | 2.824165000  | 0.570818000  | -3.755391000 |
| H | 2.546318000  | -0.539974000 | -2.381896000 |
| H | -0.674585000 | 0.707402000  | 2.313301000  |
| H | 3.234398000  | -3.108435000 | -1.123276000 |

**Table S4** Optimized-coordinates for  $[\text{Cu}^{\text{II}}_2(\text{L}^1)(\mu\text{-OH})(\text{OH})(\text{H}_2\text{O})^+ (\text{I}^{\text{A}}_{\text{aq}})]$ 

|    |              |              |              |
|----|--------------|--------------|--------------|
| Cu | 0.157180000  | -0.255902000 | -0.154531000 |
| N  | 0.020284000  | 0.106960000  | 1.911035000  |
| N  | 2.079617000  | -0.025481000 | 0.317678000  |
| C  | 2.372943000  | 0.139935000  | 1.615568000  |
| Cu | -1.590651000 | -0.259184000 | -2.650787000 |
| C  | 1.323238000  | -1.559369000 | -2.580008000 |
| C  | 1.226131000  | 0.178756000  | 2.527790000  |
| C  | -1.099200000 | 0.157228000  | 2.640715000  |
| N  | 3.221551000  | 0.043328000  | -0.367534000 |
| C  | 3.762071000  | 0.301986000  | 1.766569000  |
| O  | -1.566175000 | 0.367943000  | -0.798546000 |
| N  | -1.295423000 | -0.977312000 | -4.486342000 |
| N  | -1.699074000 | 1.679166000  | -4.430080000 |
| C  | -1.425773000 | -0.344108000 | -5.657911000 |
| C  | -1.766573000 | 1.087710000  | -5.641194000 |
| C  | 0.955237000  | -2.764926000 | -3.242250000 |
| C  | 2.711778000  | -1.302894000 | -2.413283000 |
| C  | 1.328831000  | 0.302487000  | 3.913190000  |
| N  | -0.935507000 | -2.241986000 | -4.742846000 |
| C  | -1.998389000 | 2.977691000  | -4.340816000 |
| C  | -1.146556000 | -1.247816000 | -6.706427000 |
| C  | -2.127426000 | 1.785399000  | -6.798511000 |
| C  | 1.943160000  | -3.672408000 | -3.642011000 |
| C  | -0.479887000 | -3.076321000 | -3.617699000 |
| C  | 3.662283000  | -2.238348000 | -2.828169000 |
| C  | 3.191865000  | 0.009782000  | -1.840895000 |
| C  | -0.824268000 | -2.441334000 | -6.078579000 |
| C  | -2.367597000 | 3.754700000  | -5.441626000 |
| H  | -1.937984000 | 3.415329000  | -3.347432000 |
| H  | -1.161814000 | -1.061232000 | -7.768957000 |
| H  | -2.177108000 | 1.276722000  | -7.754909000 |
| C  | -2.430135000 | 3.142015000  | -6.692681000 |
| H  | 1.630396000  | -4.586901000 | -4.141347000 |
| C  | 3.306295000  | -3.449140000 | -3.430014000 |
| H  | -0.577085000 | -4.116926000 | -3.929094000 |
| H  | -1.183565000 | -2.903912000 | -2.799017000 |
| H  | -0.522810000 | -3.398217000 | -6.478044000 |
| H  | -2.597356000 | 4.806797000  | -5.314903000 |
| H  | -2.714529000 | 3.708801000  | -7.573404000 |
| C  | 4.347315000  | -4.464369000 | -3.834886000 |
| H  | 3.982139000  | -5.112000000 | -4.636865000 |
| H  | 4.620441000  | -5.110386000 | -2.991299000 |
| H  | 5.264859000  | -3.977726000 | -4.179296000 |
| H  | 2.303614000  | 0.357287000  | 4.383830000  |
| H  | -2.034976000 | 0.098143000  | 2.095877000  |
| C  | -1.076061000 | 0.281740000  | 4.028899000  |
| H  | -2.006262000 | 0.321574000  | 4.583104000  |
| H  | 4.715633000  | -2.004447000 | -2.689024000 |
| C  | 4.264994000  | 0.238061000  | 0.473133000  |

|   |              |              |              |
|---|--------------|--------------|--------------|
| H | 5.273125000  | 0.327832000  | 0.097250000  |
| H | 4.326321000  | 0.457934000  | 2.672648000  |
| C | 0.159641000  | 0.353001000  | 4.671283000  |
| H | 0.215175000  | 0.448414000  | 5.750524000  |
| H | 4.212824000  | 0.213860000  | -2.164429000 |
| H | 2.552044000  | 0.835344000  | -2.163064000 |
| H | -2.398221000 | 0.131061000  | -0.376436000 |
| O | -3.510874000 | -0.501168000 | -2.567057000 |
| H | -3.835783000 | -0.718681000 | -3.448238000 |
| O | 0.413550000  | -0.676981000 | -2.126547000 |
| O | 0.037591000  | -2.569126000 | 0.403373000  |
| H | 0.290400000  | -3.234404000 | -0.247628000 |
| H | -0.757931000 | -2.906558000 | 0.831895000  |

**Table S5** Optimized-coordinates for  $[\text{Cu}^{\text{II}}_2(\text{L}^1)(\text{OH})_2(\text{H}_2\text{O})]^+$  ( $\text{I}^{\text{B}}_{\text{aq}}$ )

|    |              |              |              |
|----|--------------|--------------|--------------|
| Cu | -0.009809000 | 0.045453000  | 0.078789000  |
| O  | 0.051037000  | 0.096011000  | 2.374677000  |
| O  | 1.879448000  | 0.122092000  | -0.309204000 |
| O  | 0.087313000  | -2.004552000 | -0.000490000 |
| N  | -0.478835000 | 2.105613000  | -0.269739000 |
| N  | -2.051344000 | 0.025727000  | 0.132530000  |
| C  | -2.658911000 | 1.219620000  | 0.053141000  |
| Cu | 1.315046000  | -3.138948000 | 1.203807000  |
| C  | -0.636362000 | -2.619920000 | -0.955053000 |
| O  | 0.426393000  | -2.438144000 | 2.765339000  |
| C  | -1.802825000 | 2.381151000  | -0.192509000 |
| C  | 0.380167000  | 3.103291000  | -0.509044000 |
| N  | -3.004495000 | -0.882442000 | 0.375357000  |
| C  | -4.044830000 | 1.068407000  | 0.241620000  |
| N  | 2.138678000  | -4.111361000 | -0.382497000 |
| N  | 2.248455000  | -4.816213000 | 2.149769000  |
| C  | 2.937334000  | -5.151364000 | -0.095478000 |
| C  | 2.987127000  | -5.574423000 | 1.305030000  |
| C  | -0.031520000 | -3.055210000 | -2.156247000 |
| C  | -2.022645000 | -2.830938000 | -0.777605000 |
| C  | -2.292526000 | 3.679628000  | -0.346198000 |
| N  | 2.246698000  | -3.885381000 | -1.696991000 |
| C  | 2.196761000  | -5.143398000 | 3.445935000  |
| C  | 3.567641000  | -5.610438000 | -1.266116000 |
| C  | 3.714161000  | -6.677579000 | 1.756102000  |
| C  | -0.801789000 | -3.690895000 | -3.132971000 |
| C  | 1.448302000  | -2.829634000 | -2.348841000 |
| C  | -2.764178000 | -3.471787000 | -1.772590000 |
| C  | -2.676596000 | -2.317276000 | 0.481062000  |
| C  | 3.093584000  | -4.774449000 | -2.266502000 |
| C  | 2.891852000  | -6.230448000 | 3.971799000  |
| H  | 1.572797000  | -4.520980000 | 4.077327000  |
| H  | 4.264813000  | -6.425808000 | -1.378704000 |
| H  | 4.298065000  | -7.266535000 | 1.058378000  |



|   |              |              |              |
|---|--------------|--------------|--------------|
| C | 3.667829000  | -7.004862000 | 3.109515000  |
| H | -0.320127000 | -4.012499000 | -4.054106000 |
| C | -2.174242000 | -3.917769000 | -2.962946000 |
| H | 1.720046000  | -2.857651000 | -3.404689000 |
| H | 1.755648000  | -1.871272000 | -1.921671000 |
| H | 3.292299000  | -4.749808000 | -3.327490000 |
| H | 2.820763000  | -6.457129000 | 5.029017000  |
| H | 4.225215000  | -7.857264000 | 3.483405000  |
| C | -2.984285000 | -4.637185000 | -4.015241000 |
| H | -2.999603000 | -5.719062000 | -3.833097000 |
| H | -2.566621000 | -4.482344000 | -5.014290000 |
| H | -4.023280000 | -4.295021000 | -4.022351000 |
| H | -3.357406000 | 3.869451000  | -0.279722000 |
| H | 1.429079000  | 2.838433000  | -0.576690000 |
| C | -0.030268000 | 4.424310000  | -0.673470000 |
| H | 0.704006000  | 5.197872000  | -0.864580000 |
| H | -3.829542000 | -3.627630000 | -1.615995000 |
| C | -4.221374000 | -0.292677000 | 0.440684000  |
| H | -5.112268000 | -0.875888000 | 0.620056000  |
| H | -4.811023000 | 1.827771000  | 0.236910000  |
| C | -1.391684000 | 4.714378000  | -0.586697000 |
| H | -1.748803000 | 5.731585000  | -0.708254000 |
| H | -3.620753000 | -2.826491000 | 0.676622000  |
| H | -2.015997000 | -2.440983000 | 1.342419000  |
| H | 2.257666000  | 0.999679000  | -0.195025000 |
| H | 0.816128000  | 0.575648000  | 2.709653000  |
| H | 0.209217000  | -0.884220000 | 2.580550000  |
| H | 0.945219000  | -2.578906000 | 3.564528000  |
| O | 3.060897000  | -1.641533000 | 1.171700000  |
| H | 3.211301000  | -1.265321000 | 2.045552000  |
| H | 2.647006000  | -0.907387000 | 0.607782000  |

**Table S6** Optimized-coordinates for [Cu<sup>II</sup><sub>2</sub>(L<sup>1</sup>)( $\mu$ -OH)(OH)(HPNP)] (II<sup>A</sup>)

|    |              |              |              |
|----|--------------|--------------|--------------|
| Cu | -0.569637000 | -0.063745000 | 0.038782000  |
| O  | -0.514638000 | 0.145696000  | 3.640833000  |
| O  | 1.206489000  | 0.596668000  | -0.406038000 |
| O  | -0.210788000 | -2.012598000 | -0.508757000 |
| N  | -1.361254000 | 1.882956000  | 0.270086000  |
| N  | -1.711270000 | 0.293266000  | -1.850492000 |
| C  | -1.827507000 | 1.609204000  | -2.059980000 |
| Cu | -0.834555000 | -2.753217000 | 1.299336000  |
| C  | 0.431166000  | -2.489697000 | -1.579367000 |
| O  | -1.791829000 | -1.062992000 | 1.303833000  |
| C  | -1.832638000 | 2.462878000  | -0.862108000 |
| C  | -1.358508000 | 2.569281000  | 1.420929000  |
| N  | -1.634682000 | -0.284941000 | -3.048273000 |
| C  | -1.855317000 | 1.879694000  | -3.447212000 |
| N  | 0.192939000  | -4.426068000 | 1.052377000  |
| N  | -2.220981000 | -4.286558000 | 2.048852000  |

|   |              |              |              |
|---|--------------|--------------|--------------|
| C | -0.326656000 | -5.590069000 | 1.461991000  |
| C | -1.675291000 | -5.526213000 | 2.041692000  |
| C | 1.641077000  | -3.221507000 | -1.449030000 |
| C | -0.094259000 | -2.298719000 | -2.889633000 |
| C | -2.294144000 | 3.781960000  | -0.857478000 |
| N | 1.407364000  | -4.669170000 | 0.552879000  |
| C | -3.446709000 | -4.111131000 | 2.549370000  |
| C | 0.596289000  | -6.624929000 | 1.212663000  |
| C | -2.362103000 | -6.632016000 | 2.545045000  |
| C | 2.328789000  | -3.654969000 | -2.586013000 |
| C | 2.176661000  | -3.577103000 | -0.079949000 |
| C | 0.632387000  | -2.745176000 | -3.997792000 |
| C | -1.490450000 | -1.748642000 | -3.118792000 |
| C | 1.685993000  | -5.993263000 | 0.627533000  |
| C | -4.198579000 | -5.164944000 | 3.069877000  |
| H | -3.829767000 | -3.095339000 | 2.529151000  |
| H | 0.496989000  | -7.678153000 | 1.424271000  |
| H | -1.904063000 | -7.614457000 | 2.529874000  |
| C | -3.642256000 | -6.443893000 | 3.065854000  |
| H | 3.258827000  | -4.204211000 | -2.454414000 |
| C | 1.861054000  | -3.405204000 | -3.880292000 |
| H | 3.205957000  | -3.931099000 | -0.147460000 |
| H | 2.151914000  | -2.725266000 | 0.602644000  |
| H | 2.624533000  | -6.385221000 | 0.264788000  |
| H | -5.190431000 | -4.980777000 | 3.466073000  |
| H | -4.196762000 | -7.287564000 | 3.463396000  |
| C | 2.641857000  | -3.836867000 | -5.098586000 |
| H | 1.976547000  | -4.086504000 | -5.930727000 |
| H | 3.264038000  | -4.710920000 | -4.885031000 |
| H | 3.310087000  | -3.039052000 | -5.446505000 |
| H | -2.671809000 | 4.225308000  | -1.771920000 |
| H | -0.980120000 | 2.036300000  | 2.289365000  |
| C | -1.809853000 | 3.885822000  | 1.498478000  |
| H | -1.789469000 | 4.409881000  | 2.447039000  |
| H | 0.209664000  | -2.593837000 | -4.989130000 |
| C | -1.724011000 | 0.634224000  | -4.045306000 |
| H | -1.693948000 | 0.342064000  | -5.084645000 |
| H | -1.941276000 | 2.832879000  | -3.946391000 |
| C | -2.276963000 | 4.500773000  | 0.336206000  |
| H | -2.633271000 | 5.525518000  | 0.359213000  |
| H | -1.840063000 | -2.043611000 | -4.109503000 |
| H | -2.182425000 | -2.151848000 | -2.375603000 |
| H | 1.182717000  | 1.551024000  | -0.532367000 |
| H | -1.707011000 | -0.635808000 | 2.172114000  |
| O | 0.059007000  | -2.386181000 | 3.280908000  |
| P | 0.417248000  | -1.018648000 | 3.828848000  |
| O | 1.928883000  | -0.701168000 | 3.342083000  |
| O | 0.593483000  | -1.159056000 | 5.489701000  |
| C | 1.324178000  | -2.068086000 | 6.186737000  |
| C | 1.268642000  | -1.946736000 | 7.586588000  |
| C | 2.101971000  | -3.076231000 | 5.590851000  |
| C | 1.982519000  | -2.819356000 | 8.390280000  |

|   |             |              |             |
|---|-------------|--------------|-------------|
| H | 0.660846000 | -1.161362000 | 8.021360000 |
| C | 2.818852000 | -3.952261000 | 6.394774000 |
| H | 2.135390000 | -3.175835000 | 4.513857000 |
| C | 2.755778000 | -3.819225000 | 7.785758000 |
| H | 1.947995000 | -2.735613000 | 9.468938000 |
| H | 3.424046000 | -4.733558000 | 5.952766000 |
| N | 3.509032000 | -4.738004000 | 8.622163000 |
| O | 3.448249000 | -4.605711000 | 9.846550000 |
| O | 4.181491000 | -5.616475000 | 8.077815000 |
| C | 2.406850000 | 0.621687000  | 3.017785000 |
| C | 3.629856000 | 0.497446000  | 2.106038000 |
| O | 3.350551000 | -0.227919000 | 0.918098000 |
| H | 2.541899000 | 0.135120000  | 0.454743000 |
| H | 1.611817000 | 1.182412000  | 2.517558000 |
| H | 5.083387000 | 1.803946000  | 1.176449000 |
| C | 4.196352000 | 1.891667000  | 1.809552000 |
| H | 4.482379000 | 2.411409000  | 2.730367000 |
| H | 3.459380000 | 2.508399000  | 1.282239000 |
| H | 2.680565000 | 1.141927000  | 3.942852000 |
| H | 4.389826000 | -0.088122000 | 2.639320000 |

**Table S7** Optimized-coordinates for  $[\text{Cu}^{\text{II}}_2(\text{L}^1)(\text{OH})_2(\text{HPNP})]$  (**II<sup>B</sup>**)

|    |              |              |              |
|----|--------------|--------------|--------------|
| Cu | -0.562971000 | 0.006060000  | -0.122827000 |
| O  | -1.014154000 | -0.247925000 | 2.087768000  |
| O  | 1.377134000  | 0.123139000  | 0.003001000  |
| O  | -0.599944000 | -1.987330000 | -0.548592000 |
| N  | -0.876109000 | 2.092035000  | 0.053831000  |
| N  | -2.421537000 | 0.257113000  | -1.027268000 |
| C  | -2.899299000 | 1.513468000  | -1.034847000 |
| Cu | -0.717879000 | -3.659445000 | 0.645913000  |
| C  | -0.569056000 | -2.264195000 | -1.867618000 |
| O  | -2.643831000 | -3.604194000 | 0.722737000  |
| C  | -2.074495000 | 2.535354000  | -0.388455000 |
| C  | -0.034610000 | 2.944133000  | 0.647948000  |
| N  | -3.289988000 | -0.491050000 | -1.719754000 |
| C  | -4.116459000 | 1.565156000  | -1.736776000 |
| N  | 1.139742000  | -4.305243000 | -0.042899000 |
| N  | -0.493056000 | -5.515840000 | 1.642211000  |
| C  | 1.545133000  | -5.497166000 | 0.426064000  |
| C  | 0.673938000  | -6.155789000 | 1.402335000  |
| C  | 0.649674000  | -2.597153000 | -2.500641000 |
| C  | -1.755473000 | -2.226043000 | -2.636511000 |
| C  | -2.459900000 | 3.869405000  | -0.237502000 |
| N  | 2.059890000  | -3.904313000 | -0.929549000 |
| C  | -1.348737000 | -6.016407000 | 2.539729000  |
| C  | 2.765978000  | -5.862409000 | -0.170254000 |

|   |              |              |              |
|---|--------------|--------------|--------------|
| C | 1.001919000  | -7.344583000 | 2.059042000  |
| C | 0.667191000  | -2.864548000 | -3.872374000 |
| C | 1.911225000  | -2.635306000 | -1.670201000 |
| C | -1.701070000 | -2.501127000 | -4.004956000 |
| C | -3.064154000 | -1.933357000 | -1.940072000 |
| C | 3.055148000  | -4.816553000 | -1.033961000 |
| C | -1.092708000 | -7.196648000 | 3.235076000  |
| H | -2.257265000 | -5.446564000 | 2.702654000  |
| H | 3.352019000  | -6.754246000 | -0.011849000 |
| H | 1.944200000  | -7.838640000 | 1.852220000  |
| C | 0.103191000  | -7.870611000 | 2.984738000  |
| H | 1.615183000  | -3.106478000 | -4.348606000 |
| C | -0.497742000 | -2.821777000 | -4.649939000 |
| H | 2.797011000  | -2.559517000 | -2.302565000 |
| H | 1.908173000  | -1.812901000 | -0.947195000 |
| H | 3.885022000  | -4.658427000 | -1.706489000 |
| H | -1.814689000 | -7.570765000 | 3.951555000  |
| H | 0.337040000  | -8.792120000 | 3.507692000  |
| C | -0.465602000 | -3.140396000 | -6.126410000 |
| H | -0.716988000 | -4.192154000 | -6.312295000 |
| H | 0.526997000  | -2.963103000 | -6.550078000 |
| H | -1.186975000 | -2.533460000 | -6.681913000 |
| H | -3.427595000 | 4.200322000  | -0.596318000 |
| H | 0.909213000  | 2.522560000  | 0.974118000  |
| C | -0.345648000 | 4.289780000  | 0.833213000  |
| H | 0.365544000  | 4.948446000  | 1.317758000  |
| H | -2.622364000 | -2.472305000 | -4.583511000 |
| C | -4.325036000 | 0.261183000  | -2.161352000 |
| H | -5.122325000 | -0.179522000 | -2.741056000 |
| H | -4.747939000 | 2.418999000  | -1.926727000 |
| C | -1.581443000 | 4.755532000  | 0.382980000  |
| H | -1.859320000 | 5.796389000  | 0.512346000  |
| H | -3.906922000 | -2.269453000 | -2.546166000 |
| H | -3.088387000 | -2.438866000 | -0.966862000 |
| H | 1.709331000  | 0.834068000  | -0.555876000 |
| H | -2.999060000 | -4.497731000 | 0.782544000  |
| O | -0.098065000 | -2.659960000 | 2.569214000  |
| P | -0.465737000 | -1.277070000 | 3.041757000  |
| O | 0.736593000  | -0.674875000 | 3.954561000  |
| O | -1.666888000 | -1.425562000 | 4.207808000  |
| C | -1.711559000 | -2.293584000 | 5.248711000  |
| C | -2.956643000 | -2.418438000 | 5.891489000  |
| C | -0.601540000 | -3.027242000 | 5.704647000  |
| C | -3.099636000 | -3.269121000 | 6.974678000  |
| H | -3.797131000 | -1.841050000 | 5.523380000  |
| C | -0.742622000 | -3.882513000 | 6.788597000  |
| H | 0.358068000  | -2.926424000 | 5.214960000  |
| C | -1.988054000 | -3.999778000 | 7.415265000  |
| H | -4.053644000 | -3.375851000 | 7.474961000  |
| H | 0.102106000  | -4.453897000 | 7.151828000  |
| N | -2.131791000 | -4.899340000 | 8.546058000  |
| O | -3.231486000 | -4.982310000 | 9.098069000  |

|   |              |              |             |
|---|--------------|--------------|-------------|
| O | -1.149945000 | -5.548889000 | 8.913454000 |
| C | 1.479421000  | 0.516081000  | 3.615187000 |
| C | 2.899174000  | 0.174272000  | 3.154417000 |
| O | 2.906718000  | -0.664432000 | 2.009056000 |
| H | 2.336519000  | -0.291031000 | 1.278527000 |
| H | 0.942654000  | 1.068380000  | 2.839338000 |
| H | 4.722930000  | 1.210151000  | 2.624108000 |
| C | 3.703904000  | 1.460735000  | 2.931346000 |
| H | 3.759599000  | 2.062467000  | 3.844890000 |
| H | 3.253029000  | 2.074915000  | 2.143454000 |
| H | 1.518898000  | 1.125872000  | 4.522643000 |
| H | 3.378673000  | -0.408570000 | 3.951391000 |

**Table 8** Optimized-coordinates for  $[\text{Cu}^{\text{II}}_2(\text{L}^1)(\mu\text{-OH})(\text{OH})(\text{HPNP})]^\# (\text{TSA}^\text{A})$

|    |              |              |              |
|----|--------------|--------------|--------------|
| Cu | -2.516940000 | -0.726717000 | -0.802275000 |
| O  | 0.527510000  | -3.010360000 | 0.688769000  |
| O  | -2.665981000 | -0.910395000 | 1.429441000  |
| O  | -1.721216000 | 1.133993000  | -0.631043000 |
| N  | -3.457428000 | -2.592372000 | -1.037911000 |
| N  | -4.255692000 | -0.189786000 | -1.649414000 |
| C  | -5.149773000 | -1.162651000 | -1.878898000 |
| Cu | 0.226554000  | 0.376657000  | -0.379466000 |
| C  | -2.407236000 | 2.178352000  | -0.129778000 |
| O  | -0.632107000 | -1.202993000 | -1.096250000 |
| C  | -4.732436000 | -2.514592000 | -1.491604000 |
| C  | -2.951385000 | -3.775437000 | -0.671852000 |
| N  | -4.753413000 | 0.942417000  | -2.148178000 |
| C  | -6.275471000 | -0.623584000 | -2.529268000 |
| N  | 0.876107000  | 2.164985000  | 0.189087000  |
| N  | 1.838498000  | 1.219367000  | -2.105522000 |
| C  | 1.848595000  | 2.872065000  | -0.397233000 |
| C  | 2.465286000  | 2.306621000  | -1.606994000 |
| C  | -2.053093000 | 2.816643000  | 1.092165000  |
| C  | -3.530600000 | 2.691433000  | -0.833875000 |
| C  | -5.538976000 | -3.648734000 | -1.590055000 |
| N  | 0.413322000  | 2.877660000  | 1.220632000  |
| C  | 2.333765000  | 0.644312000  | -3.203866000 |
| C  | 2.023553000  | 4.085469000  | 0.302279000  |
| C  | 3.605852000  | 2.851575000  | -2.204173000 |
| C  | -2.828008000 | 3.874089000  | 1.578330000  |
| C  | -0.822153000 | 2.417360000  | 1.878244000  |
| C  | -4.279052000 | 3.747571000  | -0.305809000 |
| C  | -3.909186000 | 2.151576000  | -2.192208000 |
| C  | 1.078812000  | 4.053626000  | 1.318345000  |
| C  | 3.466445000  | 1.120920000  | -3.868138000 |
| H  | 1.801854000  | -0.231713000 | -3.566304000 |
| H  | 2.723730000  | 4.880104000  | 0.096510000  |
| H  | 4.089236000  | 3.722076000  | -1.774560000 |

|   |              |              |              |
|---|--------------|--------------|--------------|
| C | 4.110288000  | 2.246457000  | -3.354525000 |
| H | -2.532606000 | 4.339034000  | 2.516647000  |
| C | -3.961151000 | 4.352576000  | 0.912515000  |
| H | -0.840940000 | 2.866599000  | 2.871977000  |
| H | -0.726395000 | 1.332032000  | 1.984364000  |
| H | 0.832659000  | 4.772410000  | 2.085644000  |
| H | 3.827705000  | 0.620237000  | -4.759444000 |
| H | 4.995034000  | 2.647143000  | -3.838747000 |
| C | -4.800810000 | 5.468313000  | 1.486247000  |
| H | -5.564357000 | 5.079070000  | 2.171317000  |
| H | -5.321944000 | 6.019794000  | 0.698346000  |
| H | -4.189536000 | 6.177358000  | 2.052485000  |
| H | -6.557095000 | -3.563978000 | -1.952135000 |
| H | -1.927834000 | -3.770139000 | -0.309224000 |
| C | -3.696065000 | -4.951746000 | -0.747400000 |
| H | -3.251325000 | -5.892977000 | -0.446474000 |
| H | -5.129131000 | 4.116359000  | -0.876071000 |
| C | -5.976517000 | 0.723494000  | -2.688127000 |
| H | -6.531989000 | 1.525472000  | -3.150789000 |
| H | -7.169950000 | -1.130749000 | -2.855544000 |
| C | -5.009233000 | -4.882359000 | -1.212717000 |
| H | -5.617424000 | -5.778193000 | -1.280915000 |
| H | -4.482562000 | 2.893286000  | -2.748933000 |
| H | -3.019554000 | 1.892056000  | -2.772272000 |
| H | -3.108864000 | -1.699797000 | 1.756928000  |
| H | -0.320871000 | -1.973536000 | -0.579600000 |
| O | 1.757952000  | -0.652261000 | 0.456049000  |
| P | 1.496857000  | -1.971900000 | 1.211410000  |
| O | 1.964644000  | -2.039064000 | 2.779097000  |
| O | 2.988386000  | -2.801766000 | 0.749661000  |
| C | 4.248004000  | -2.380245000 | 0.854003000  |
| C | 5.244202000  | -3.253023000 | 0.352865000  |
| C | 4.640694000  | -1.146576000 | 1.425446000  |
| C | 6.582080000  | -2.916159000 | 0.419463000  |
| H | 4.932569000  | -4.195666000 | -0.083679000 |
| C | 5.981408000  | -0.806795000 | 1.493465000  |
| H | 3.889525000  | -0.467427000 | 1.803900000  |
| C | 6.950984000  | -1.688265000 | 0.993143000  |
| H | 7.342980000  | -3.585060000 | 0.037450000  |
| H | 6.287266000  | 0.135163000  | 1.931615000  |
| N | 8.344529000  | -1.329192000 | 1.068855000  |
| O | 9.188948000  | -2.115472000 | 0.621540000  |
| O | 8.656160000  | -0.245549000 | 1.578654000  |
| C | 1.038565000  | -1.852021000 | 3.863109000  |
| C | 0.117613000  | -0.681587000 | 3.522205000  |
| O | -0.246332000 | -0.870771000 | 2.188036000  |
| H | -1.699695000 | -0.929028000 | 1.795129000  |
| H | 0.455343000  | -2.773186000 | 3.991091000  |
| H | -1.715944000 | 0.231163000  | 4.254284000  |
| C | -1.065482000 | -0.615484000 | 4.492976000  |
| H | -0.719482000 | -0.493507000 | 5.526227000  |
| H | -1.663679000 | -1.532247000 | 4.436337000  |

|   |             |              |             |
|---|-------------|--------------|-------------|
| H | 1.648423000 | -1.683772000 | 4.754695000 |
| H | 0.707593000 | 0.251357000  | 3.636880000 |

**Table S9** Optimized-coordinates for  $[\text{Cu}^{\text{II}}_2(\text{L}^1)(\text{OH})_2(\text{HPNP})]^\#$  (**TS<sup>B</sup>**)

|    |              |              |              |
|----|--------------|--------------|--------------|
| Cu | -2.239771000 | -0.771302000 | 0.072810000  |
| O  | -0.541147000 | -1.884566000 | 0.469668000  |
| O  | -2.626444000 | -0.544630000 | 2.170338000  |
| O  | -1.362432000 | 1.021968000  | -0.160498000 |
| N  | -3.335351000 | -2.558189000 | 0.080944000  |
| N  | -3.462743000 | -0.552167000 | -1.569750000 |
| C  | -4.342557000 | -1.541823000 | -1.797182000 |
| Cu | 0.631209000  | 1.372492000  | -0.643875000 |
| C  | -2.161464000 | 2.108473000  | -0.173205000 |
| O  | 0.330888000  | 0.611897000  | -2.379263000 |
| C  | -4.285153000 | -2.676272000 | -0.873408000 |
| C  | -3.167622000 | -3.529384000 | 0.981886000  |
| N  | -3.657430000 | 0.371668000  | -2.514426000 |
| C  | -5.124926000 | -1.236356000 | -2.924802000 |
| N  | 0.808327000  | 2.846333000  | 0.804571000  |
| N  | 2.566027000  | 2.175684000  | -1.046417000 |
| C  | 1.952962000  | 3.546462000  | 0.793853000  |
| C  | 2.942807000  | 3.180340000  | -0.221829000 |
| C  | -2.201939000 | 2.982283000  | 0.939662000  |
| C  | -2.943339000 | 2.423601000  | -1.311210000 |
| C  | -5.110193000 | -3.800154000 | -0.943409000 |
| N  | 0.075516000  | 3.314795000  | 1.820218000  |
| C  | 3.420567000  | 1.733525000  | -1.975653000 |
| C  | 1.947906000  | 4.495493000  | 1.834098000  |
| C  | 4.196735000  | 3.786070000  | -0.333893000 |
| C  | -3.053958000 | 4.090029000  | 0.924185000  |
| C  | -1.260009000 | 2.753079000  | 2.098121000  |
| C  | -3.781099000 | 3.540781000  | -1.291562000 |
| C  | -2.811260000 | 1.577314000  | -2.555503000 |
| C  | 0.725414000  | 4.313929000  | 2.463445000  |
| C  | 4.690156000  | 2.282178000  | -2.145557000 |
| H  | 3.077057000  | 0.910379000  | -2.592996000 |
| H  | 2.713041000  | 5.208786000  | 2.097785000  |
| H  | 4.474026000  | 4.591329000  | 0.336538000  |
| C  | 5.078741000  | 3.330811000  | -1.311405000 |
| H  | -3.075281000 | 4.746589000  | 1.791495000  |
| C  | -3.870847000 | 4.383175000  | -0.174963000 |
| H  | -1.614739000 | 3.253080000  | 3.000394000  |
| H  | -1.113645000 | 1.690650000  | 2.305181000  |
| H  | 0.278282000  | 4.813362000  | 3.309960000  |
| H  | 5.349880000  | 1.892863000  | -2.912099000 |
| H  | 6.058337000  | 3.785436000  | -1.415915000 |
| C  | -4.814309000 | 5.561793000  | -0.158871000 |
| H  | -4.458117000 | 6.349079000  | 0.511546000  |
| H  | -5.812170000 | 5.264987000  | 0.187610000  |
| H  | -4.933463000 | 5.990686000  | -1.158274000 |

|   |              |              |              |
|---|--------------|--------------|--------------|
| H | -5.865711000 | -3.876069000 | -1.716878000 |
| H | -2.381105000 | -3.366419000 | 1.708931000  |
| C | -3.951903000 | -4.681966000 | 0.976339000  |
| H | -3.788541000 | -5.451726000 | 1.721483000  |
| H | -4.369892000 | 3.769508000  | -2.177508000 |
| C | -4.652593000 | -0.002384000 | -3.351807000 |
| H | -4.944672000 | 0.623666000  | -4.181723000 |
| H | -5.915286000 | -1.818803000 | -3.371920000 |
| C | -4.938048000 | -4.813981000 | -0.001943000 |
| H | -5.566882000 | -5.697650000 | -0.034274000 |
| H | -3.127787000 | 2.134711000  | -3.438108000 |
| H | -1.773174000 | 1.244411000  | -2.678817000 |
| H | -3.063526000 | 0.266068000  | 2.449735000  |
| H | 0.957954000  | 0.953124000  | -3.025414000 |
| O | 1.510424000  | -0.179527000 | 0.711328000  |
| P | 0.837040000  | -1.505312000 | 1.004396000  |
| O | 1.419189000  | -2.400099000 | 2.249102000  |
| O | 1.723191000  | -2.553296000 | -0.134009000 |
| C | 3.036779000  | -2.635091000 | -0.319544000 |
| C | 3.472290000  | -3.437175000 | -1.404051000 |
| C | 4.006755000  | -1.991162000 | 0.487524000  |
| C | 4.816710000  | -3.594355000 | -1.677372000 |
| H | 2.722869000  | -3.927094000 | -2.016284000 |
| C | 5.355027000  | -2.146579000 | 0.214466000  |
| H | 3.689822000  | -1.374059000 | 1.316498000  |
| C | 5.761826000  | -2.945280000 | -0.865046000 |
| H | 5.147006000  | -4.207508000 | -2.506435000 |
| H | 6.099452000  | -1.657147000 | 0.830185000  |
| N | 7.165365000  | -3.101576000 | -1.144061000 |
| O | 7.509942000  | -3.812972000 | -2.096999000 |
| O | 7.987854000  | -2.520281000 | -0.424101000 |
| C | 0.772954000  | -2.459572000 | 3.532986000  |
| C | 0.313133000  | -1.052315000 | 3.916215000  |
| O | -0.245867000 | -0.513051000 | 2.756621000  |
| H | -0.087826000 | -3.137737000 | 3.462110000  |
| H | -0.954204000 | -0.062394000 | 5.371528000  |
| C | -0.638426000 | -1.078439000 | 5.114653000  |
| H | -0.151967000 | -1.513489000 | 5.995546000  |
| H | -1.533647000 | -1.668898000 | 4.889340000  |
| H | 1.509196000  | -2.883331000 | 4.221229000  |
| H | 1.211193000  | -0.471641000 | 4.202769000  |
| H | -1.606719000 | -0.539452000 | 2.528614000  |



**Table S10** Optimized-coordinates for [Cu<sup>II</sup><sub>2</sub>(L<sup>1</sup>)( $\mu$ -OH)(H<sub>2</sub>O)(Cyp)] (III<sup>A</sup>)

|    |              |              |              |
|----|--------------|--------------|--------------|
| Cu | -0.641692000 | 0.048964000  | -0.267273000 |
| O  | -0.303041000 | -0.080820000 | 3.661692000  |
| O  | 1.685814000  | 0.002283000  | 0.124334000  |
| O  | -0.591091000 | -1.893201000 | -0.796108000 |
| N  | -0.576807000 | 2.091250000  | 0.178482000  |
| N  | -0.713443000 | 0.843372000  | -2.098572000 |
| C  | -0.634018000 | 2.178475000  | -2.190623000 |
| Cu | -1.235171000 | -2.514178000 | 1.137303000  |
| C  | 0.124487000  | -2.425949000 | -1.801285000 |
| O  | -1.674795000 | -0.646358000 | 1.269507000  |
| C  | -0.511904000 | 2.892773000  | -0.914375000 |
| C  | -0.483217000 | 2.621608000  | 1.403656000  |
| N  | -0.912497000 | 0.360257000  | -3.324564000 |
| C  | -0.764043000 | 2.562590000  | -3.538436000 |
| N  | -0.797082000 | -4.378001000 | 0.766695000  |
| N  | -3.024096000 | -3.567217000 | 1.795969000  |
| C  | -1.663908000 | -5.356223000 | 1.046202000  |
| C  | -2.932371000 | -4.911974000 | 1.639454000  |
| C  | 1.105647000  | -3.434714000 | -1.583514000 |
| C  | -0.102051000 | -2.014874000 | -3.144125000 |
| C  | -0.356647000 | 4.273389000  | -0.792170000 |
| N  | 0.300870000  | -4.920885000 | 0.246586000  |
| C  | -4.131316000 | -3.038727000 | 2.324067000  |
| C  | -1.091519000 | -6.591557000 | 0.681775000  |
| C  | -3.969951000 | -5.763510000 | 2.016676000  |
| C  | 1.842284000  | -3.939405000 | -2.659857000 |
| C  | 1.375509000  | -4.018931000 | -0.213087000 |
| C  | 0.665253000  | -2.543056000 | -4.186602000 |
| C  | -1.227940000 | -1.070939000 | -3.495073000 |
| C  | 0.160699000  | -6.266982000 | 0.171192000  |
| C  | -5.211570000 | -3.824687000 | 2.726654000  |
| H  | -4.144165000 | -1.957716000 | 2.421804000  |
| H  | -1.512586000 | -7.580368000 | 0.776312000  |
| H  | -3.874319000 | -6.834793000 | 1.881486000  |
| C  | -5.124455000 | -5.207272000 | 2.568502000  |
| H  | 2.588452000  | -4.705045000 | -2.458429000 |
| C  | 1.662264000  | -3.498180000 | -3.974181000 |
| H  | 2.293201000  | -4.607723000 | -0.226783000 |
| H  | 1.470486000  | -3.252430000 | 0.559492000  |
| H  | 0.946969000  | -6.888801000 | -0.229854000 |
| H  | -6.092697000 | -3.358176000 | 3.151364000  |
| H  | -5.945551000 | -5.848955000 | 2.870527000  |
| C  | 2.505071000  | -4.029470000 | -5.108299000 |
| H  | 1.966746000  | -3.983156000 | -6.059444000 |
| H  | 2.800903000  | -5.068097000 | -4.933381000 |
| H  | 3.426037000  | -3.444954000 | -5.226418000 |
| H  | -0.303662000 | 4.896752000  | -1.677155000 |
| H  | -0.522275000 | 1.924237000  | 2.235791000  |
| C  | -0.331050000 | 3.993700000  | 1.600694000  |

|   |              |              |              |
|---|--------------|--------------|--------------|
| H | -0.262755000 | 4.389863000  | 2.606966000  |
| H | 0.460502000  | -2.207750000 | -5.201164000 |
| C | -0.947980000 | 1.369918000  | -4.227242000 |
| H | -1.112483000 | 1.173718000  | -5.276252000 |
| H | -0.746343000 | 3.555356000  | -3.960193000 |
| C | -0.268055000 | 4.827636000  | 0.484789000  |
| H | -0.147910000 | 5.899286000  | 0.603882000  |
| H | -1.505952000 | -1.190308000 | -4.542337000 |
| H | -2.109436000 | -1.269599000 | -2.879125000 |
| H | 2.154738000  | 0.806244000  | -0.126453000 |
| H | -1.391036000 | -0.309998000 | 2.141144000  |
| O | 0.234471000  | -2.433245000 | 2.725189000  |
| P | 0.693696000  | -1.200142000 | 3.490241000  |
| O | 1.400008000  | -1.679939000 | 4.893236000  |
| C | 2.755193000  | -1.187324000 | 4.999052000  |
| C | 3.268548000  | -1.043666000 | 3.558802000  |
| O | 2.091730000  | -0.593958000 | 2.822571000  |
| H | 1.940519000  | -0.181233000 | 1.050178000  |
| H | 2.747265000  | -0.219318000 | 5.512731000  |
| H | 4.690135000  | 0.023805000  | 2.335488000  |
| C | 4.398633000  | -0.050244000 | 3.386352000  |
| H | 5.270870000  | -0.384343000 | 3.956993000  |
| H | 4.103637000  | 0.940200000  | 3.744727000  |
| H | 3.333477000  | -1.908301000 | 5.578346000  |
| H | 3.549262000  | -2.027158000 | 3.163144000  |

**Table S11** Optimized-coordinates for [Cu<sup>II</sup><sub>2</sub>(L<sup>1</sup>)(OH)(H<sub>2</sub>O)(Cyp)] (**III<sup>B</sup>**)

|    |              |              |              |
|----|--------------|--------------|--------------|
| Cu | -0.352656000 | 0.089300000  | -0.333870000 |
| O  | 0.263265000  | -0.029604000 | 1.575288000  |
| O  | 1.808488000  | 0.835538000  | -0.919677000 |
| O  | 0.193202000  | -1.768247000 | -0.873653000 |
| N  | -0.968533000 | 2.066800000  | 0.015961000  |
| N  | -1.788700000 | 0.325313000  | -1.725824000 |
| C  | -2.354652000 | 1.540140000  | -1.822116000 |
| Cu | -0.047028000 | -3.416703000 | 0.357868000  |
| C  | 0.448084000  | -2.050023000 | -2.172163000 |
| O  | -1.901551000 | -2.989431000 | 0.494010000  |
| C  | -1.878455000 | 2.542031000  | -0.866675000 |
| C  | -0.477001000 | 2.868826000  | 0.965879000  |
| N  | -2.389442000 | -0.466544000 | -2.616949000 |
| C  | -3.341865000 | 1.523868000  | -2.821822000 |
| N  | 1.774841000  | -4.192888000 | -0.207963000 |
| N  | -0.074072000 | -5.300632000 | 1.317452000  |
| C  | 2.056855000  | -5.413691000 | 0.271752000  |
| C  | 1.037428000  | -6.046233000 | 1.111692000  |
| C  | 1.763563000  | -2.361957000 | -2.590007000 |

|   |              |              |              |
|---|--------------|--------------|--------------|
| C | -0.591537000 | -2.095798000 | -3.130743000 |
| C | -2.315389000 | 3.865680000  | -0.818685000 |
| N | 2.848083000  | -3.787877000 | -0.897211000 |
| C | -1.043168000 | -5.771768000 | 2.110690000  |
| C | 3.347289000  | -5.805001000 | -0.132262000 |
| C | 1.187543000  | -7.307904000 | 1.691096000  |
| C | 2.022261000  | -2.640535000 | -3.933651000 |
| C | 2.865738000  | -2.472970000 | -1.566273000 |
| C | -0.295735000 | -2.377314000 | -4.467222000 |
| C | -2.021917000 | -1.891205000 | -2.693971000 |
| C | 3.815710000  | -4.735517000 | -0.880132000 |
| C | -0.963651000 | -7.018303000 | 2.727728000  |
| H | -1.901123000 | -5.125802000 | 2.261652000  |
| H | 3.870217000  | -6.723385000 | 0.083966000  |
| H | 2.085631000  | -7.886547000 | 1.508947000  |
| C | 0.171018000  | -7.799111000 | 2.507196000  |
| H | 3.041871000  | -2.874453000 | -4.232348000 |
| C | 1.009879000  | -2.635764000 | -4.901667000 |
| H | 3.846827000  | -2.387975000 | -2.034522000 |
| H | 2.778250000  | -1.711314000 | -0.791799000 |
| H | 4.753526000  | -4.581323000 | -1.392573000 |
| H | -1.772603000 | -7.359421000 | 3.362873000  |
| H | 0.266869000  | -8.776464000 | 2.968391000  |
| C | 1.316176000  | -2.898931000 | -6.356084000 |
| H | 0.447863000  | -3.311076000 | -6.877867000 |
| H | 2.148662000  | -3.599708000 | -6.468246000 |
| H | 1.598950000  | -1.973613000 | -6.873329000 |
| H | -3.043287000 | 4.226473000  | -1.536044000 |
| H | 0.234772000  | 2.411201000  | 1.643470000  |
| C | -0.868389000 | 4.202232000  | 1.078062000  |
| H | -0.451273000 | 4.823667000  | 1.861679000  |
| H | -1.111111000 | -2.411199000 | -5.186682000 |
| C | -3.331349000 | 0.220114000  | -3.302367000 |
| H | -3.925303000 | -0.262231000 | -4.064251000 |
| H | -3.982487000 | 2.328750000  | -3.146560000 |
| C | -1.798585000 | 4.704742000  | 0.168187000  |
| H | -2.122701000 | 5.738519000  | 0.225865000  |
| H | -2.713341000 | -2.341991000 | -3.406576000 |
| H | -2.185215000 | -2.318893000 | -1.697564000 |
| H | 1.935387000  | 1.783467000  | -1.040454000 |
| H | -2.439823000 | -3.753299000 | 0.725727000  |
| O | 1.051530000  | -2.422828000 | 2.151677000  |
| P | 1.332379000  | -0.947379000 | 2.166167000  |
| O | 1.754561000  | -0.454143000 | 3.667600000  |
| C | 2.969172000  | 0.332123000  | 3.636055000  |
| C | 3.782939000  | -0.203098000 | 2.448463000  |
| O | 2.766511000  | -0.523398000 | 1.445774000  |
| H | 2.341545000  | 0.580544000  | -0.146068000 |
| H | 2.711562000  | 1.388325000  | 3.498400000  |
| H | 5.294843000  | 0.343180000  | 1.010307000  |
| C | 4.787742000  | 0.774866000  | 1.876840000  |
| H | 5.544829000  | 1.004036000  | 2.633202000  |

|   |             |              |             |
|---|-------------|--------------|-------------|
| H | 4.301706000 | 1.708667000  | 1.578443000 |
| H | 3.481135000 | 0.197268000  | 4.589450000 |
| H | 4.271979000 | -1.144050000 | 2.725134000 |

**Table S12** Optimized-coordinates for HPNP

|   |              |              |              |
|---|--------------|--------------|--------------|
| O | -0.357254000 | -0.043482000 | 1.954310000  |
| O | -0.606817000 | -2.591548000 | 2.601795000  |
| P | -0.004796000 | -1.231313000 | 2.801858000  |
| O | 1.617105000  | -1.441938000 | 2.890616000  |
| O | -0.350385000 | -0.694304000 | 4.380389000  |
| C | -0.222547000 | -1.378722000 | 5.540396000  |
| C | -0.637475000 | -0.699209000 | 6.702430000  |
| C | 0.295564000  | -2.684337000 | 5.634749000  |
| C | -0.536299000 | -1.305901000 | 7.941934000  |
| H | -1.034417000 | 0.305198000  | 6.607004000  |
| C | 0.398247000  | -3.294959000 | 6.876510000  |
| H | 0.602505000  | -3.211441000 | 4.741352000  |
| C | -0.015968000 | -2.605389000 | 8.021825000  |
| H | -0.851854000 | -0.790752000 | 8.840216000  |
| H | 0.794959000  | -4.298533000 | 6.964121000  |
| N | 0.094038000  | -3.248171000 | 9.317020000  |
| O | -0.273565000 | -2.627692000 | 10.318468000 |
| O | 0.551336000  | -4.392908000 | 9.373752000  |
| C | 2.509905000  | -0.319278000 | 2.992019000  |
| C | 3.947615000  | -0.802311000 | 2.818681000  |
| O | 4.165135000  | -1.360415000 | 1.514772000  |
| H | 4.087524000  | -0.658192000 | 0.856825000  |
| H | 2.260420000  | 0.423812000  | 2.225215000  |
| H | 5.964923000  | -0.041719000 | 2.982326000  |
| C | 4.942442000  | 0.318799000  | 3.121368000  |
| H | 4.838043000  | 0.667305000  | 4.153407000  |
| H | 4.785430000  | 1.176008000  | 2.456090000  |
| H | 2.398157000  | 0.148773000  | 3.977624000  |
| H | 4.114715000  | -1.640466000 | 3.503043000  |

**Table S13** Optimized-coordinates for Cyp

|   |              |              |              |
|---|--------------|--------------|--------------|
| O | 0.004926000  | 0.002228000  | -0.012146000 |
| O | -0.023114000 | 0.021517000  | 2.594929000  |
| P | 0.751254000  | -0.015764000 | 1.299768000  |
| O | 1.928533000  | 1.172448000  | 1.346108000  |
| C | 3.227662000  | 0.621332000  | 1.077025000  |
| C | 3.184675000  | -0.822718000 | 1.598725000  |
| O | 1.847668000  | -1.274859000 | 1.278226000  |
| H | 3.423201000  | 0.639463000  | -0.003357000 |
| H | 4.102055000  | -2.764120000 | 1.372370000  |
| C | 4.210976000  | -1.750280000 | 0.977857000  |
| H | 5.221276000  | -1.400806000 | 1.214755000  |

|   |             |              |              |
|---|-------------|--------------|--------------|
| H | 4.098119000 | -1.782255000 | -0.110067000 |
| H | 3.976529000 | 1.228396000  | 1.590379000  |
| H | 3.289936000 | -0.816964000 | 2.692427000  |

**Table S14** Optimized-coordinates for PNP (*p*-nitro-phenol)

|   |              |              |             |
|---|--------------|--------------|-------------|
| O | -0.004529000 | -0.101995000 | 0.012720000 |
| C | 0.000379000  | -0.021660000 | 1.276404000 |
| C | 1.231563000  | 0.017497000  | 2.042552000 |
| C | -1.224891000 | 0.036889000  | 2.050758000 |
| C | 1.235979000  | 0.103868000  | 3.410291000 |
| H | 2.167457000  | -0.024018000 | 1.492372000 |
| C | -1.218929000 | 0.123979000  | 3.418441000 |
| H | -2.164913000 | 0.009256000  | 1.506761000 |
| C | 0.011264000  | 0.158931000  | 4.125545000 |
| H | 2.168059000  | 0.131681000  | 3.962676000 |
| H | -2.146808000 | 0.166240000  | 3.976953000 |
| N | 0.016791000  | 0.248833000  | 5.525869000 |
| O | 1.109296000  | 0.274065000  | 6.143752000 |
| O | -1.070721000 | 0.303590000  | 6.150639000 |

**Table S15** Optimized-coordinates for [Cu<sup>II</sup><sub>2</sub>(L<sup>1</sup>)(μ-OMe)(OMe)(HPNP)]

|    |              |              |              |
|----|--------------|--------------|--------------|
| Cu | -0.787753000 | 0.174927000  | 0.042621000  |
| O  | -0.366287000 | 0.529232000  | 4.380118000  |
| O  | 1.001888000  | 0.884050000  | -0.178660000 |
| O  | -0.275462000 | -1.805744000 | -0.260706000 |
| N  | -1.741811000 | 2.081468000  | -0.043746000 |
| N  | -1.740696000 | 0.230640000  | -1.972786000 |
| C  | -2.041773000 | 1.478810000  | -2.343012000 |
| Cu | -1.062015000 | -2.449556000 | 1.521726000  |
| C  | 0.499701000  | -2.332387000 | -1.210360000 |
| O  | -2.101140000 | -0.846632000 | 1.203381000  |
| C  | -2.183421000 | 2.469493000  | -1.265624000 |
| C  | -1.836246000 | 2.927411000  | 0.989455000  |
| N  | -1.596702000 | -0.482856000 | -3.088388000 |
| C  | -2.115377000 | 1.562434000  | -3.752828000 |
| N  | 0.098549000  | -4.072316000 | 1.501119000  |
| N  | -2.456118000 | -4.104557000 | 2.148487000  |
| C  | -0.381171000 | -5.246458000 | 1.929693000  |
| C  | -1.799101000 | -5.277852000 | 2.310092000  |
| C  | 1.739427000  | -2.950806000 | -0.894811000 |
| C  | 0.095259000  | -2.310745000 | -2.575931000 |
| C  | -2.732576000 | 3.739398000  | -1.467190000 |
| N  | 1.384948000  | -4.247077000 | 1.182652000  |
| C  | -3.759253000 | -4.048212000 | 2.440029000  |
| C  | 0.642124000  | -6.214640000 | 1.884802000  |
| C  | -2.440736000 | -6.424139000 | 2.784126000  |
| C  | 2.569996000  | -3.422381000 | -1.914514000 |

|   |              |              |              |
|---|--------------|--------------|--------------|
| C | 2.146316000  | -3.149658000 | 0.548494000  |
| C | 0.962761000  | -2.789348000 | -3.563234000 |
| C | -1.314837000 | -1.923860000 | -2.981566000 |
| C | 1.749434000  | -5.534811000 | 1.395586000  |
| C | -4.474817000 | -5.147560000 | 2.915011000  |
| H | -4.245587000 | -3.090454000 | 2.285167000  |
| H | 0.593924000  | -7.255947000 | 2.162666000  |
| H | -1.887895000 | -7.348611000 | 2.906522000  |
| C | -3.798223000 | -6.353838000 | 3.092789000  |
| H | 3.519822000  | -3.879050000 | -1.643185000 |
| C | 2.220615000  | -3.326174000 | -3.266330000 |
| H | 3.196836000  | -3.434258000 | 0.616624000  |
| H | 1.998794000  | -2.250434000 | 1.148617000  |
| H | 2.754373000  | -5.869865000 | 1.185858000  |
| H | -5.531251000 | -5.052235000 | 3.137709000  |
| H | -4.319293000 | -7.230329000 | 3.463730000  |
| C | 3.154097000  | -3.794249000 | -4.357019000 |
| H | 2.600027000  | -4.138248000 | -5.235592000 |
| H | 3.791493000  | -4.614374000 | -4.013206000 |
| H | 3.817275000  | -2.985159000 | -4.688334000 |
| H | -3.086167000 | 4.025190000  | -2.451338000 |
| H | -1.461898000 | 2.565433000  | 1.941688000  |
| C | -2.371860000 | 4.207307000  | 0.864554000  |
| H | -2.425769000 | 4.859293000  | 1.728604000  |
| H | 0.631317000  | -2.766449000 | -4.599650000 |
| C | -1.821843000 | 0.279498000  | -4.191158000 |
| H | -1.763000000 | -0.137857000 | -5.185539000 |
| H | -2.334519000 | 2.421929000  | -4.367757000 |
| C | -2.824780000 | 4.617391000  | -0.389892000 |
| H | -3.247935000 | 5.607034000  | -0.527898000 |
| H | -1.539971000 | -2.348549000 | -3.961025000 |
| H | -2.035397000 | -2.320597000 | -2.261653000 |
| O | -0.480457000 | -1.974938000 | 3.546830000  |
| P | 0.282270000  | -0.790537000 | 4.105158000  |
| O | 1.625021000  | -0.647342000 | 3.197941000  |
| O | 0.909536000  | -1.254689000 | 5.599226000  |
| C | 1.598937000  | -2.377941000 | 5.920431000  |
| C | 2.094083000  | -2.433326000 | 7.236356000  |
| C | 1.827981000  | -3.444420000 | 5.032360000  |
| C | 2.814097000  | -3.535120000 | 7.665600000  |
| H | 1.904022000  | -1.599984000 | 7.903242000  |
| C | 2.550564000  | -4.549948000 | 5.460126000  |
| H | 1.427389000  | -3.409017000 | 4.028407000  |
| C | 3.039959000  | -4.589181000 | 6.770166000  |
| H | 3.201343000  | -3.586683000 | 8.675150000  |
| H | 2.732157000  | -5.379542000 | 4.788595000  |
| N | 3.795460000  | -5.747662000 | 7.212017000  |
| O | 4.212736000  | -5.772922000 | 8.372344000  |
| O | 3.993239000  | -6.664956000 | 6.411604000  |
| C | 2.330649000  | 0.609961000  | 3.106870000  |
| C | 3.552389000  | 0.438801000  | 2.206695000  |
| O | 3.216734000  | -0.060555000 | 0.921002000  |

|   |              |              |              |
|---|--------------|--------------|--------------|
| H | 2.365952000  | 0.330401000  | 0.574373000  |
| H | 1.654668000  | 1.365957000  | 2.694603000  |
| H | 5.205247000  | 1.635914000  | 1.490543000  |
| C | 4.320711000  | 1.763271000  | 2.120533000  |
| H | 4.650701000  | 2.100162000  | 3.109320000  |
| H | 3.696617000  | 2.548281000  | 1.678765000  |
| H | 2.650808000  | 0.929355000  | 4.105007000  |
| H | 4.204539000  | -0.318724000 | 2.661905000  |
| C | -2.970868000 | -0.255301000 | 2.146880000  |
| H | -2.427466000 | 0.290548000  | 2.927290000  |
| H | -3.652451000 | 0.436213000  | 1.632584000  |
| H | -3.589283000 | -1.020027000 | 2.636114000  |
| C | 1.275952000  | 1.995850000  | -0.989357000 |
| H | 0.912401000  | 1.866294000  | -2.022399000 |
| H | 0.840740000  | 2.930608000  | -0.599658000 |
| H | 2.365749000  | 2.147270000  | -1.051258000 |

**Table S16** Optimized-coordinates for  $[\text{Cu}^{\text{II}}_2(\text{L}^1)(\mu\text{-OMe})(\text{OMe})(\text{HPNP})]^\#$

|    |              |              |              |
|----|--------------|--------------|--------------|
| Cu | -2.621463000 | -0.786327000 | -0.420700000 |
| O  | 0.961812000  | -3.213814000 | 1.216318000  |
| O  | -2.358579000 | -1.025255000 | 1.725065000  |
| O  | -1.818528000 | 1.060794000  | -0.349606000 |
| N  | -3.602954000 | -2.618798000 | -0.599262000 |
| N  | -4.430822000 | -0.207507000 | -1.157082000 |
| C  | -5.338656000 | -1.176791000 | -1.335915000 |
| Cu | 0.169229000  | 0.321980000  | -0.468311000 |
| C  | -2.439928000 | 2.108965000  | 0.215169000  |
| O  | -0.836847000 | -1.084954000 | -1.312557000 |
| C  | -4.901624000 | -2.530983000 | -0.980960000 |
| C  | -3.087328000 | -3.807823000 | -0.267756000 |
| N  | -4.960086000 | 0.927996000  | -1.611640000 |
| C  | -6.504814000 | -0.633326000 | -1.908839000 |
| N  | 0.874234000  | 2.067885000  | 0.202178000  |
| N  | 1.661875000  | 1.220635000  | -2.199648000 |
| C  | 1.832629000  | 2.775637000  | -0.409079000 |
| C  | 2.348312000  | 2.264558000  | -1.687274000 |
| C  | -1.957965000 | 2.728591000  | 1.400475000  |
| C  | -3.612395000 | 2.649884000  | -0.381069000 |
| C  | -5.718322000 | -3.660939000 | -1.039397000 |
| N  | 0.512781000  | 2.737393000  | 1.302025000  |
| C  | 2.060838000  | 0.702710000  | -3.364101000 |
| C  | 2.103082000  | 3.939121000  | 0.341500000  |
| C  | 3.457044000  | 2.818640000  | -2.334492000 |
| C  | -2.657494000 | 3.798712000  | 1.964951000  |
| C  | -0.669687000 | 2.279216000  | 2.052004000  |
| C  | -4.283633000 | 3.716951000  | 0.222397000  |
| C  | -4.117768000 | 2.135023000  | -1.707941000 |

|   |              |              |              |
|---|--------------|--------------|--------------|
| C | 1.230494000  | 3.880091000  | 1.418443000  |
| C | 3.154471000  | 1.193209000  | -4.080656000 |
| H | 1.480682000  | -0.136072000 | -3.739040000 |
| H | 2.817594000  | 4.719565000  | 0.130877000  |
| H | 3.990964000  | 3.652832000  | -1.893041000 |
| C | 3.863005000  | 2.271543000  | -3.550840000 |
| H | -2.265347000 | 4.250305000  | 2.873927000  |
| C | -3.837897000 | 4.304944000  | 1.409804000  |
| H | -0.584763000 | 2.692979000  | 3.057501000  |
| H | -0.590131000 | 1.189979000  | 2.108162000  |
| H | 1.067252000  | 4.559486000  | 2.241750000  |
| H | 3.436454000  | 0.739301000  | -5.024011000 |
| H | 4.720525000  | 2.681492000  | -4.074632000 |
| C | -4.596244000 | 5.433508000  | 2.065401000  |
| H | -5.316286000 | 5.053172000  | 2.800798000  |
| H | -5.159949000 | 6.014656000  | 1.329808000  |
| H | -3.921782000 | 6.113246000  | 2.594406000  |
| H | -6.754407000 | -3.567754000 | -1.343590000 |
| H | -2.046189000 | -3.811760000 | 0.036907000  |
| C | -3.840394000 | -4.979616000 | -0.308246000 |
| H | -3.384601000 | -5.924426000 | -0.036706000 |
| H | -5.174373000 | 4.111041000  | -0.262267000 |
| C | -6.216259000 | 0.714634000  | -2.074908000 |
| H | -6.799937000 | 1.520898000  | -2.493278000 |
| H | -7.419283000 | -1.137450000 | -2.179950000 |
| C | -5.176979000 | -4.899963000 | -0.699419000 |
| H | -5.793810000 | -5.791593000 | -0.738531000 |
| H | -4.734635000 | 2.889685000  | -2.196776000 |
| H | -3.284285000 | 1.883841000  | -2.369679000 |
| O | 1.683670000  | -0.811298000 | 0.208723000  |
| P | 1.767246000  | -1.944309000 | 1.243963000  |
| O | 2.536145000  | -1.569084000 | 2.650621000  |
| O | 3.296593000  | -2.646964000 | 0.611970000  |
| C | 4.427963000  | -2.031885000 | 0.293798000  |
| C | 5.398806000  | -2.803360000 | -0.394983000 |
| C | 4.727718000  | -0.682085000 | 0.606895000  |
| C | 6.612698000  | -2.257832000 | -0.762491000 |
| H | 5.164048000  | -3.836191000 | -0.628959000 |
| C | 5.943760000  | -0.133231000 | 0.239627000  |
| H | 3.999946000  | -0.082971000 | 1.135701000  |
| C | 6.886053000  | -0.915936000 | -0.445940000 |
| H | 7.350130000  | -2.849138000 | -1.290752000 |
| H | 6.175843000  | 0.897104000  | 0.479349000  |
| N | 8.145384000  | -0.337302000 | -0.829513000 |
| O | 8.967125000  | -1.038845000 | -1.435297000 |
| O | 8.373746000  | 0.846257000  | -0.544435000 |
| C | 1.776107000  | -1.475828000 | 3.864814000  |
| C | 0.592401000  | -0.539122000 | 3.618692000  |
| O | 0.085177000  | -0.888931000 | 2.366513000  |
| H | -1.376384000 | -0.999078000 | 2.047733000  |
| H | 1.424331000  | -2.476981000 | 4.147276000  |
| H | -1.259587000 | 0.061905000  | 4.587233000  |



|   |              |              |              |
|---|--------------|--------------|--------------|
| C | -0.426138000 | -0.626657000 | 4.758985000  |
| H | 0.033496000  | -0.363053000 | 5.719207000  |
| H | -0.830896000 | -1.641919000 | 4.837955000  |
| H | 2.465873000  | -1.108678000 | 4.629392000  |
| H | 0.995238000  | 0.495178000  | 3.602797000  |
| C | -0.298791000 | -2.273448000 | -1.851018000 |
| H | 0.045590000  | -2.962178000 | -1.070876000 |
| H | -1.062356000 | -2.773466000 | -2.463252000 |
| H | 0.552268000  | -2.044707000 | -2.507267000 |
| C | -3.164238000 | -1.823106000 | 2.584023000  |
| H | -4.198279000 | -1.779918000 | 2.231503000  |
| H | -2.841566000 | -2.872562000 | 2.590521000  |
| H | -3.133384000 | -1.442186000 | 3.611405000  |
